# Supplementary material for: Insights Into Mechanisms of Biofilm Formation in Acinetobacter baumannii and Implications for Uropathogenesis
Source: Front Cell Infect Microbiol. 2020 May 29;10:253. doi: 10.3389/fcimb.2020.00253 (PMC7273844; doi:10.3389/fcimb.2020.00253)
Supplement: Supplementary file 1 [file Table_1.XLSX]

## Sheet: Table S1
Supplementary Table 1. Genes reported to be transcriptionally up-regulated in biofilm cells. Compilation of the ATCC 17978 gene name, ATCC 17978 gene IDs, initial called gene ID (if identified in another A. baumannii strain), gene description, transcript fold change of biofilm cells compared to exponential phase control cells, reporting publication, A. baumannii strain used, and biofilm formation…
Gene Name	ATCC 17978 Gene ID	Initial Called Gene ID	Gene description	Fold change biofilm vs. exponential phase cells	Publication	Strain	Conditions
	A1S_0009		RND type efflux pump	2.57	Rumbo-Feal 2013	ATCC 17978	24 hr biofilm, continuous flow microfermentor on Pyrex slide at 37C
	A1S_0032	ABUW_3851	putative signal peptide	3.71367	Penesyan 2019	AB5075-UW	144 hr biofilm, 72 hr continuous flow at 37C to establish biofilm then additional 72 hr mock treatment at 37C
	A1S_0032		signal peptide	32.18	Rumbo-Feal 2013	ATCC 17978	24 hr biofilm, continuous flow microfermentor on Pyrex slide at 37C
	A1S_0040	ABUW_3843	putative oxidoreductase	5.09547	Penesyan 2019	AB5075-UW	144 hr biofilm, 72 hr continuous flow at 37C to establish biofilm then additional 72 hr mock treatment at 37C
	A1S_0041	ABUW_3842	fatty acid desaturase	4.17702	Penesyan 2019	AB5075-UW	144 hr biofilm, 72 hr continuous flow at 37C to establish biofilm then additional 72 hr mock treatment at 37C
araT	A1S_0071	ABUW_3810	aromatic-amino-acid aminotransferase	2.31422	Penesyan 2019	AB5075-UW	144 hr biofilm, 72 hr continuous flow at 37C to establish biofilm then additional 72 hr mock treatment at 37C
	A1S_0072	ABUW_3809	transcriptional regulator, GntR family	2.5996	Penesyan 2019	AB5075-UW	144 hr biofilm, 72 hr continuous flow at 37C to establish biofilm then additional 72 hr mock treatment at 37C
prpB	A1S_0073	ABUW_3808	methylisocitrate lyase	3.29154	Penesyan 2019	AB5075-UW	144 hr biofilm, 72 hr continuous flow at 37C to establish biofilm then additional 72 hr mock treatment at 37C
	A1S_0073		2-methylisocitrate lyase	6.6	Rumbo-Feal 2013	ATCC 17978	24 hr biofilm, continuous flow microfermentor on Pyrex slide at 37C
prpC	A1S_0074	ABUW_3807	2-methylcitrate synthase	3.49275	Penesyan 2019	AB5075-UW	144 hr biofilm, 72 hr continuous flow at 37C to establish biofilm then additional 72 hr mock treatment at 37C
acnD	A1S_0076	ABUW_3806	2-methylisocitrate dehydratase, Fe/S-dependent	3.16832	Penesyan 2019	AB5075-UW	144 hr biofilm, 72 hr continuous flow at 37C to establish biofilm then additional 72 hr mock treatment at 37C
	A1S_0087		short-chain dehydrogenase	2.57	Rumbo-Feal 2013	ATCC 17978	24 hr biofilm, continuous flow microfermentor on Pyrex slide at 37C
	A1S_0103		3-hydroxyisobutyrate dehydrogenase	61.82	Rumbo-Feal 2013	ATCC 17978	24 hr biofilm, continuous flow microfermentor on Pyrex slide at 37C
	A1S_0107		enoyl-CoA hydratase	5.51	Rumbo-Feal 2013	ATCC 17978	24 hr biofilm, continuous flow microfermentor on Pyrex slide at 37C
	A1S_0109		homoserine lactone synthase	60.22	Rumbo-Feal 2013	ATCC 17978	24 hr biofilm, continuous flow microfermentor on Pyrex slide at 37C
	A1S_0112		acyl-CoA synthetase/AMP-acid ligases II	75.17	Rumbo-Feal 2013	ATCC 17978	24 hr biofilm, continuous flow microfermentor on Pyrex slide at 37C
	A1S_0113		acyl-CoA dehydrogenase	135.15	Rumbo-Feal 2013	ATCC 17978	24 hr biofilm, continuous flow microfermentor on Pyrex slide at 37C
	A1S_0114		acyl carrier protein	127.96	Rumbo-Feal 2013	ATCC 17978	24 hr biofilm, continuous flow microfermentor on Pyrex slide at 37C
	A1S_0115		amino acid adenylation	151.37	Rumbo-Feal 2013	ATCC 17978	24 hr biofilm, continuous flow microfermentor on Pyrex slide at 37C
	A1S_0116		RND superfamily exporter	56.18	Rumbo-Feal 2013	ATCC 17978	24 hr biofilm, continuous flow microfermentor on Pyrex slide at 37C
	A1S_0117		hypothetical protein	23.97	Rumbo-Feal 2013	ATCC 17978	24 hr biofilm, continuous flow microfermentor on Pyrex slide at 37C
	A1S_0118		hypothetical protein	9.31	Rumbo-Feal 2013	ATCC 17978	24 hr biofilm, continuous flow microfermentor on Pyrex slide at 37C
guaA	A1S_0130	ABUW_3755	GMP synthase	3.17313	Penesyan 2019	AB5075-UW	144 hr biofilm, 72 hr continuous flow at 37C to establish biofilm then additional 72 hr mock treatment at 37C
atpI	A1S_0147	ABUW_3739	ATP synthase F0, I subunit	2.70576	Penesyan 2019	AB5075-UW	144 hr biofilm, 72 hr continuous flow at 37C to establish biofilm then additional 72 hr mock treatment at 37C
atpB	A1S_0148	ABUW_3738	ATP synthase F0, A subunit	4.74831	Penesyan 2019	AB5075-UW	144 hr biofilm, 72 hr continuous flow at 37C to establish biofilm then additional 72 hr mock treatment at 37C
atpE	A1S_0150	ABUW_3737	ATP synthase F0, C subunit	2.9714	Penesyan 2019	AB5075-UW	144 hr biofilm, 72 hr continuous flow at 37C to establish biofilm then additional 72 hr mock treatment at 37C
atpF	A1S_0151		F0F1 ATP synthase subunit B	1.9	Rumbo-Feal 2013	ATCC 17978	24 hr biofilm, continuous flow microfermentor on Pyrex slide at 37C
atpF	A1S_0151	ABUW_3736	ATP synthase F0, B subunit	3.51271	Penesyan 2019	AB5075-UW	144 hr biofilm, 72 hr continuous flow at 37C to establish biofilm then additional 72 hr mock treatment at 37C
atpH	A1S_0152	ABUW_3735	ATP synthase F1, delta subunit	3.30489	Penesyan 2019	AB5075-UW	144 hr biofilm, 72 hr continuous flow at 37C to establish biofilm then additional 72 hr mock treatment at 37C
atpA	A1S_0153		F0F1 ATP synthase subunit alpha	1.13	Rumbo-Feal 2013	ATCC 17978	24 hr biofilm, continuous flow microfermentor on Pyrex slide at 37C
atpA	A1S_0153	ABUW_3734	ATP synthase F1, alpha subunit	3.39321	Penesyan 2019	AB5075-UW	144 hr biofilm, 72 hr continuous flow at 37C to establish biofilm then additional 72 hr mock treatment at 37C
atpG	A1S_0154		F0F1 ATP synthase subunit gamma	1.65	Rumbo-Feal 2013	ATCC 17978	24 hr biofilm, continuous flow microfermentor on Pyrex slide at 37C
atpG	A1S_0154	ABUW_3733	ATP synthase F1, gamma subunit AtpG	3.2624	Penesyan 2019	AB5075-UW	144 hr biofilm, 72 hr continuous flow at 37C to establish biofilm then additional 72 hr mock treatment at 37C
atpD	A1S_0155		F0F1 ATP synthase subunit beta	1.06	Rumbo-Feal 2013	ATCC 17978	24 hr biofilm, continuous flow microfermentor on Pyrex slide at 37C
atpD	A1S_0155	ABUW_3732	ATP synthase F1, beta subunit	3.48673	Penesyan 2019	AB5075-UW	144 hr biofilm, 72 hr continuous flow at 37C to establish biofilm then additional 72 hr mock treatment at 37C
atpC	A1S_0156		F0F1 ATP synthase subunit epsilon	1	Rumbo-Feal 2013	ATCC 17978	24 hr biofilm, continuous flow microfermentor on Pyrex slide at 37C
atpC	A1S_0156	ABUW_3731	ATP synthase F1, epsilon subunit	3.773	Penesyan 2019	AB5075-UW	144 hr biofilm, 72 hr continuous flow at 37C to establish biofilm then additional 72 hr mock treatment at 37C
def1	A1S_0168	ABUW_3721	peptide deformylase	2.11006	Penesyan 2019	AB5075-UW	144 hr biofilm, 72 hr continuous flow at 37C to establish biofilm then additional 72 hr mock treatment at 37C
	A1S_0169	ABUW_3720	hypothetical protein	2.49404	Penesyan 2019	AB5075-UW	144 hr biofilm, 72 hr continuous flow at 37C to establish biofilm then additional 72 hr mock treatment at 37C
	A1S_0172	ABUW_3717	hypothetical protein	2.62665	Penesyan 2019	AB5075-UW	144 hr biofilm, 72 hr continuous flow at 37C to establish biofilm then additional 72 hr mock treatment at 37C
	A1S_0183	ABUW_3703	radical SAM N-terminal domain protein	3.21798	Penesyan 2019	AB5075-UW	144 hr biofilm, 72 hr continuous flow at 37C to establish biofilm then additional 72 hr mock treatment at 37C
	A1S_0201	ABUW_3685	outer membrane protein OprE3	3.07971	Penesyan 2019	AB5075-UW	144 hr biofilm, 72 hr continuous flow at 37C to establish biofilm then additional 72 hr mock treatment at 37C
	A1S_0202	ABUW_3683	putative signal peptide	3.88825	Penesyan 2019	AB5075-UW	144 hr biofilm, 72 hr continuous flow at 37C to establish biofilm then additional 72 hr mock treatment at 37C
thrC	A1S_0238	ABUW_3637	threonine synthase	2.15385	Penesyan 2019	AB5075-UW	144 hr biofilm, 72 hr continuous flow at 37C to establish biofilm then additional 72 hr mock treatment at 37C
hom	A1S_0239	ABUW_3636	homoserine dehydrogenase	2.39448	Penesyan 2019	AB5075-UW	144 hr biofilm, 72 hr continuous flow at 37C to establish biofilm then additional 72 hr mock treatment at 37C
tuf2	A1S_0279		elongation factor Tu	1.18	Rumbo-Feal 2013	ATCC 17978	24 hr biofilm, continuous flow microfermentor on Pyrex slide at 37C
tuf2	A1S_0279	ABUW_3598	translation elongation factor Tu	2.42509	Penesyan 2019	AB5075-UW	144 hr biofilm, 72 hr continuous flow at 37C to establish biofilm then additional 72 hr mock treatment at 37C
secE	A1S_0281	ABUW_3596	preprotein translocase, SecE subunit	2.52993	Penesyan 2019	AB5075-UW	144 hr biofilm, 72 hr continuous flow at 37C to establish biofilm then additional 72 hr mock treatment at 37C
nusG	A1S_0282	ABUW_3595	transcription termination/antitermination factor NusG	2.98535	Penesyan 2019	AB5075-UW	144 hr biofilm, 72 hr continuous flow at 37C to establish biofilm then additional 72 hr mock treatment at 37C
rplK	A1S_0283		50S ribosomal protein L11	1.99	Rumbo-Feal 2013	ATCC 17978	24 hr biofilm, continuous flow microfermentor on Pyrex slide at 37C
rplK	A1S_0283	ABUW_3594	ribosomal protein L11	4.10888	Penesyan 2019	AB5075-UW	144 hr biofilm, 72 hr continuous flow at 37C to establish biofilm then additional 72 hr mock treatment at 37C
rplA	A1S_0284	ABUW_3593	ribosomal protein L1	4.14848	Penesyan 2019	AB5075-UW	144 hr biofilm, 72 hr continuous flow at 37C to establish biofilm then additional 72 hr mock treatment at 37C
rplJ	A1S_0285		50S ribosomal protein	2.31	Rumbo-Feal 2013	ATCC 17978	24 hr biofilm, continuous flow microfermentor on Pyrex slide at 37C
rplJ	A1S_0285	ABUW_3592	ribosomal protein L10	3.79045	Penesyan 2019	AB5075-UW	144 hr biofilm, 72 hr continuous flow at 37C to establish biofilm then additional 72 hr mock treatment at 37C
rplL	A1S_0286	ABUW_3591	ribosomal protein L7/L12	3.42555	Penesyan 2019	AB5075-UW	144 hr biofilm, 72 hr continuous flow at 37C to establish biofilm then additional 72 hr mock treatment at 37C
rpoB	A1S_0287	ABUW_3590	DNA-directed RNA polymerase, beta subunit	3.82384	Penesyan 2019	AB5075-UW	144 hr biofilm, 72 hr continuous flow at 37C to establish biofilm then additional 72 hr mock treatment at 37C
rpoC	A1S_0288	ABUW_3589	DNA-directed RNA polymerase, beta' subunit	3.90234	Penesyan 2019	AB5075-UW	144 hr biofilm, 72 hr continuous flow at 37C to establish biofilm then additional 72 hr mock treatment at 37C
ompW	A1S_0292		outer membrane protein W	0.53	Rumbo-Feal 2013	ATCC 17978	24 hr biofilm, continuous flow microfermentor on Pyrex slide at 37C
	A1S_0298	ABUW_3578	DSBA oxidoreductase	2.45395	Penesyan 2019	AB5075-UW	144 hr biofilm, 72 hr continuous flow at 37C to establish biofilm then additional 72 hr mock treatment at 37C
	A1S_0302		hypothetical protein	23.3	Rumbo-Feal 2013	ATCC 17978	24 hr biofilm, continuous flow microfermentor on Pyrex slide at 37C
	A1S_0324	ABUW_3554	RNA methyltransferase, TrmH family, group 3	2.54248	Penesyan 2019	AB5075-UW	144 hr biofilm, 72 hr continuous flow at 37C to establish biofilm then additional 72 hr mock treatment at 37C
secG	A1S_0331	ABUW_3547	preprotein translocase iisp family auxillary membrane component	2.75473	Penesyan 2019	AB5075-UW	144 hr biofilm, 72 hr continuous flow at 37C to establish biofilm then additional 72 hr mock treatment at 37C
	A1S_0334	ABUW_3543	hypothetical protein	3.47863	Penesyan 2019	AB5075-UW	144 hr biofilm, 72 hr continuous flow at 37C to establish biofilm then additional 72 hr mock treatment at 37C
nusA	A1S_0335	ABUW_3542	transcription elongation factor NusA	3.43427	Penesyan 2019	AB5075-UW	144 hr biofilm, 72 hr continuous flow at 37C to establish biofilm then additional 72 hr mock treatment at 37C
infB	A1S_0336	ABUW_3541	translation initiation factor IF-2	3.80152	Penesyan 2019	AB5075-UW	144 hr biofilm, 72 hr continuous flow at 37C to establish biofilm then additional 72 hr mock treatment at 37C
rbfA	A1S_0338	ABUW_3540	ribosome-binding factor A	5.08733	Penesyan 2019	AB5075-UW	144 hr biofilm, 72 hr continuous flow at 37C to establish biofilm then additional 72 hr mock treatment at 37C
ubiB	A1S_0348	ABUW_3529	2-octaprenylphenol hydroxylase of ubiquinone biosynthetic pathway	2.20222	Penesyan 2019	AB5075-UW	144 hr biofilm, 72 hr continuous flow at 37C to establish biofilm then additional 72 hr mock treatment at 37C
	A1S_0349	ABUW_3528	hypothetical protein	2.34465	Penesyan 2019	AB5075-UW	144 hr biofilm, 72 hr continuous flow at 37C to establish biofilm then additional 72 hr mock treatment at 37C
	A1S_0360		30S ribosomal protein S15	0.74	Rumbo-Feal 2013	ATCC 17978	24 hr biofilm, continuous flow microfermentor on Pyrex slide at 37C
pnp	A1S_0361	ABUW_3518	polyribonucleotide nucleotidyltransferase	4.28117	Penesyan 2019	AB5075-UW	144 hr biofilm, 72 hr continuous flow at 37C to establish biofilm then additional 72 hr mock treatment at 37C
	A1S_0399	ABUW_3482	transcriptional regulator, HTH-type, LysR	2.42502	Penesyan 2019	AB5075-UW	144 hr biofilm, 72 hr continuous flow at 37C to establish biofilm then additional 72 hr mock treatment at 37C
nudH	A1S_0414	ABUW_3467	(di)nucleoside polyphosphate hydrolase	4.00721	Penesyan 2019	AB5075-UW	144 hr biofilm, 72 hr continuous flow at 37C to establish biofilm then additional 72 hr mock treatment at 37C
asd	A1S_0427	ABUW_3451	aspartate-semialdehyde dehydrogenase	2.6439	Penesyan 2019	AB5075-UW	144 hr biofilm, 72 hr continuous flow at 37C to establish biofilm then additional 72 hr mock treatment at 37C
	A1S_0429		DAACS family glutamate:aspartate symporter	3.04	Rumbo-Feal 2013	ATCC 17978	24 hr biofilm, continuous flow microfermentor on Pyrex slide at 37C
rpmG	A1S_0447	ABUW_3431	ribosomal protein L33	3.00502	Penesyan 2019	AB5075-UW	144 hr biofilm, 72 hr continuous flow at 37C to establish biofilm then additional 72 hr mock treatment at 37C
rpmB	A1S_0448	ABUW_3430	ribosomal protein L28	2.99719	Penesyan 2019	AB5075-UW	144 hr biofilm, 72 hr continuous flow at 37C to establish biofilm then additional 72 hr mock treatment at 37C
folA	A1S_0457	ABUW_3421	dihydrofolate reductase	2.94046	Penesyan 2019	AB5075-UW	144 hr biofilm, 72 hr continuous flow at 37C to establish biofilm then additional 72 hr mock treatment at 37C
thyA	A1S_0458	ABUW_3420	thymidylate synthase	2.80856	Penesyan 2019	AB5075-UW	144 hr biofilm, 72 hr continuous flow at 37C to establish biofilm then additional 72 hr mock treatment at 37C
fumA	A1S_0480	ABUW_3397	fumarate hydratase	2.577	Penesyan 2019	AB5075-UW	144 hr biofilm, 72 hr continuous flow at 37C to establish biofilm then additional 72 hr mock treatment at 37C
pta	A1S_0481	ABUW_3396	phosphate acetyltransferase	2.35748	Penesyan 2019	AB5075-UW	144 hr biofilm, 72 hr continuous flow at 37C to establish biofilm then additional 72 hr mock treatment at 37C
pta	A1S_0481		phosphate acetyltransferase	3.92	Rumbo-Feal 2013	ATCC 17978	24 hr biofilm, continuous flow microfermentor on Pyrex slide at 37C
	A1S_0482		acetate kinase	3.31	Rumbo-Feal 2013	ATCC 17978	24 hr biofilm, continuous flow microfermentor on Pyrex slide at 37C
	A1S_0496		phosphatidylglycerophosphatase B	10.13	Rumbo-Feal 2013	ATCC 17978	24 hr biofilm, continuous flow microfermentor on Pyrex slide at 37C
	A1S_0506	ABUW_3373	small GTP-binding protein	2.2373	Penesyan 2019	AB5075-UW	144 hr biofilm, 72 hr continuous flow at 37C to establish biofilm then additional 72 hr mock treatment at 37C
engC	A1S_0531	ABUW_3368	GTPase	2.55908	Penesyan 2019	AB5075-UW	144 hr biofilm, 72 hr continuous flow at 37C to establish biofilm then additional 72 hr mock treatment at 37C
	A1S_0538		RND efflux transporter	6.59	Rumbo-Feal 2013	ATCC 17978	24 hr biofilm, continuous flow microfermentor on Pyrex slide at 37C
leuS	A1S_0541	ABUW_3359	leucyl-tRNA synthetase	2.02109	Penesyan 2019	AB5075-UW	144 hr biofilm, 72 hr continuous flow at 37C to establish biofilm then additional 72 hr mock treatment at 37C
	A1S_0547		transcriptional regulator	1.22	Rumbo-Feal 2013	ATCC 17978	24 hr biofilm, continuous flow microfermentor on Pyrex slide at 37C
	A1S_0561	ABUW_3343	hypothetical protein	2.32939	Penesyan 2019	AB5075-UW	144 hr biofilm, 72 hr continuous flow at 37C to establish biofilm then additional 72 hr mock treatment at 37C
	A1S_0591		acyl-CoA synthetase	6.17	Rumbo-Feal 2013	ATCC 17978	24 hr biofilm, continuous flow microfermentor on Pyrex slide at 37C
infC	A1S_0593	ABUW_3289	translation initiation factor IF-3	2.20427	Penesyan 2019	AB5075-UW	144 hr biofilm, 72 hr continuous flow at 37C to establish biofilm then additional 72 hr mock treatment at 37C
rplT	A1S_0597	ABUW_3284	ribosomal protein L20	4.13711	Penesyan 2019	AB5075-UW	144 hr biofilm, 72 hr continuous flow at 37C to establish biofilm then additional 72 hr mock treatment at 37C
rho	A1S_0604	ABUW_3277	transcription termination factor Rho	2.66978	Penesyan 2019	AB5075-UW	144 hr biofilm, 72 hr continuous flow at 37C to establish biofilm then additional 72 hr mock treatment at 37C
	A1S_0628		transposase	4.32	Rumbo-Feal 2013	ATCC 17978	24 hr biofilm, continuous flow microfermentor on Pyrex slide at 37C
	A1S_0644		hypothetical protein	18.27	Rumbo-Feal 2013	ATCC 17978	24 hr biofilm, continuous flow microfermentor on Pyrex slide at 37C
	A1S_0648		hypothetical protein	1.41	Rumbo-Feal 2013	ATCC 17978	24 hr biofilm, continuous flow microfermentor on Pyrex slide at 37C
	A1S_0653		ferrous iron transport protein B	4.46	Rumbo-Feal 2013	ATCC 17978	24 hr biofilm, continuous flow microfermentor on Pyrex slide at 37C
hisD	A1S_0687	ABUW_3248	histidinol dehydrogenase	2.31605	Penesyan 2019	AB5075-UW	144 hr biofilm, 72 hr continuous flow at 37C to establish biofilm then additional 72 hr mock treatment at 37C
	A1S_0736		hypothetical protein	79.49	Rumbo-Feal 2013	ATCC 17978	24 hr biofilm, continuous flow microfermentor on Pyrex slide at 37C
	A1S_0737		methyltetrahydropteroyltriglutamate/homocysteine S-methyltransferase	25.32	Rumbo-Feal 2013	ATCC 17978	24 hr biofilm, continuous flow microfermentor on Pyrex slide at 37C
	A1S_0742		iron-regulated protein	2.5	Rumbo-Feal 2013	ATCC 17978	24 hr biofilm, continuous flow microfermentor on Pyrex slide at 37C
	A1S_0745		hypothetical protein	30.81	Rumbo-Feal 2013	ATCC 17978	24 hr biofilm, continuous flow microfermentor on Pyrex slide at 37C
nrdA	A1S_0747	ABUW_3183	ribonucleoside-diphosphate reductase alpha subunit	2.05253	Penesyan 2019	AB5075-UW	144 hr biofilm, 72 hr continuous flow at 37C to establish biofilm then additional 72 hr mock treatment at 37C
nuoB	A1S_0753	ABUW_3176	NADH dehydrogenase I chain B	2.08005	Penesyan 2019	AB5075-UW	144 hr biofilm, 72 hr continuous flow at 37C to establish biofilm then additional 72 hr mock treatment at 37C
nuoCD	A1S_0754	ABUW_3175	NADH dehydrogenase I chain CD	2.18752	Penesyan 2019	AB5075-UW	144 hr biofilm, 72 hr continuous flow at 37C to establish biofilm then additional 72 hr mock treatment at 37C
nuoE	A1S_0755	ABUW_3174	NADH dehydrogenase I chain E	2.09208	Penesyan 2019	AB5075-UW	144 hr biofilm, 72 hr continuous flow at 37C to establish biofilm then additional 72 hr mock treatment at 37C
nuoF	A1S_0756	ABUW_3173	NADH dehydrogenase I chain F	2.61668	Penesyan 2019	AB5075-UW	144 hr biofilm, 72 hr continuous flow at 37C to establish biofilm then additional 72 hr mock treatment at 37C
nuoG	A1S_0757	ABUW_3172	NADH dehydrogenase I chain G	2.14747	Penesyan 2019	AB5075-UW	144 hr biofilm, 72 hr continuous flow at 37C to establish biofilm then additional 72 hr mock treatment at 37C
nuoI	A1S_0759	ABUW_3170	NADH dehydrogenase I chain I 2Fe-2S ferredoxin-related	2.22621	Penesyan 2019	AB5075-UW	144 hr biofilm, 72 hr continuous flow at 37C to establish biofilm then additional 72 hr mock treatment at 37C
	A1S_0769	ABUW_3160	ferredoxin-NADP reductase	2.11097	Penesyan 2019	AB5075-UW	144 hr biofilm, 72 hr continuous flow at 37C to establish biofilm then additional 72 hr mock treatment at 37C
	A1S_0770	ABUW_3159	hypothetical protein	2.0039	Penesyan 2019	AB5075-UW	144 hr biofilm, 72 hr continuous flow at 37C to establish biofilm then additional 72 hr mock treatment at 37C
metG	A1S_0778	ABUW_3148	methionyl-tRNA synthetase	2.25466	Penesyan 2019	AB5075-UW	144 hr biofilm, 72 hr continuous flow at 37C to establish biofilm then additional 72 hr mock treatment at 37C
	A1S_0801	ABUW_3124	major facilitator superfamily MFS_1	2.29328	Penesyan 2019	AB5075-UW	144 hr biofilm, 72 hr continuous flow at 37C to establish biofilm then additional 72 hr mock treatment at 37C
	A1S_0810	ABUW_3116	ribosomal large subunit pseudouridine synthase B	2.66534	Penesyan 2019	AB5075-UW	144 hr biofilm, 72 hr continuous flow at 37C to establish biofilm then additional 72 hr mock treatment at 37C
scpB	A1S_0811	ABUW_3115	chromosome segregation and condensation protein ScpB	2.12331	Penesyan 2019	AB5075-UW	144 hr biofilm, 72 hr continuous flow at 37C to establish biofilm then additional 72 hr mock treatment at 37C
	A1S_0814	ABUW_3112	hypothetical protein	2.61117	Penesyan 2019	AB5075-UW	144 hr biofilm, 72 hr continuous flow at 37C to establish biofilm then additional 72 hr mock treatment at 37C
	A1S_0815	ABUW_3111	hypothetical protein	3.6062	Penesyan 2019	AB5075-UW	144 hr biofilm, 72 hr continuous flow at 37C to establish biofilm then additional 72 hr mock treatment at 37C
ribB2	A1S_0823	ABUW_3103	3,4-dihydroxy-2-butanone 4-phosphate synthase	2.82984	Penesyan 2019	AB5075-UW	144 hr biofilm, 72 hr continuous flow at 37C to establish biofilm then additional 72 hr mock treatment at 37C
panD	A1S_0825	ABUW_3100	aspartate 1-decarboxylase	2.25512	Penesyan 2019	AB5075-UW	144 hr biofilm, 72 hr continuous flow at 37C to establish biofilm then additional 72 hr mock treatment at 37C
pth	A1S_0826	ABUW_3099	peptidyl-tRNA hydrolase	2.81919	Penesyan 2019	AB5075-UW	144 hr biofilm, 72 hr continuous flow at 37C to establish biofilm then additional 72 hr mock treatment at 37C
rplY	A1S_0828	ABUW_3098	ribosomal L25	2.48573	Penesyan 2019	AB5075-UW	144 hr biofilm, 72 hr continuous flow at 37C to establish biofilm then additional 72 hr mock treatment at 37C
prs	A1S_0829	ABUW_3097	phosphoribosylpyrophosphate synthetase	3.90571	Penesyan 2019	AB5075-UW	144 hr biofilm, 72 hr continuous flow at 37C to establish biofilm then additional 72 hr mock treatment at 37C
ispE	A1S_0834	ABUW_3092	4-(cytidine 5'-diphospho)-2-C-methyl-D-erythritol kinase	2.99372	Penesyan 2019	AB5075-UW	144 hr biofilm, 72 hr continuous flow at 37C to establish biofilm then additional 72 hr mock treatment at 37C
rpsL	A1S_0866	ABUW_3063	ribosomal protein S12	2.78275	Penesyan 2019	AB5075-UW	144 hr biofilm, 72 hr continuous flow at 37C to establish biofilm then additional 72 hr mock treatment at 37C
rpsG	A1S_0867	ABUW_3062	ribosomal protein S7	3.86594	Penesyan 2019	AB5075-UW	144 hr biofilm, 72 hr continuous flow at 37C to establish biofilm then additional 72 hr mock treatment at 37C
fusA	A1S_0868	ABUW_3061	translation elongation factor G	4.17774	Penesyan 2019	AB5075-UW	144 hr biofilm, 72 hr continuous flow at 37C to establish biofilm then additional 72 hr mock treatment at 37C
tuf1	A1S_0869		elongation factor Tu	1.22	Rumbo-Feal 2013	ATCC 17978	24 hr biofilm, continuous flow microfermentor on Pyrex slide at 37C
tuf1	A1S_0869	ABUW_3060	translation elongation factor Tu	2.63238	Penesyan 2019	AB5075-UW	144 hr biofilm, 72 hr continuous flow at 37C to establish biofilm then additional 72 hr mock treatment at 37C
	A1S_0870	ABUW_3059	putative metal-dependent hydrolase	2.19816	Penesyan 2019	AB5075-UW	144 hr biofilm, 72 hr continuous flow at 37C to establish biofilm then additional 72 hr mock treatment at 37C
	A1S_0878	ABUW_3051	hypothetical protein	2.15248	Penesyan 2019	AB5075-UW	144 hr biofilm, 72 hr continuous flow at 37C to establish biofilm then additional 72 hr mock treatment at 37C
sbcC	A1S_0899	ABUW_3029	ATP-dependent dsDNA exonuclease	2.33064	Penesyan 2019	AB5075-UW	144 hr biofilm, 72 hr continuous flow at 37C to establish biofilm then additional 72 hr mock treatment at 37C
	A1S_0902	ABUW_3026	glyoxalase	2.37642	Penesyan 2019	AB5075-UW	144 hr biofilm, 72 hr continuous flow at 37C to establish biofilm then additional 72 hr mock treatment at 37C
	A1S_0905	ABUW_3023	FAD dependent oxidoreductase	2.47408	Penesyan 2019	AB5075-UW	144 hr biofilm, 72 hr continuous flow at 37C to establish biofilm then additional 72 hr mock treatment at 37C
ggt	A1S_0910	ABUW_3018	gamma-glutamyltransferase	3.85354	Penesyan 2019	AB5075-UW	144 hr biofilm, 72 hr continuous flow at 37C to establish biofilm then additional 72 hr mock treatment at 37C
mqo	A1S_0923	ABUW_2973	malate dehydrogenase	3.06737	Penesyan 2019	AB5075-UW	144 hr biofilm, 72 hr continuous flow at 37C to establish biofilm then additional 72 hr mock treatment at 37C
	A1S_0946		hypothetical protein	1.13	Rumbo-Feal 2013	ATCC 17978	24 hr biofilm, continuous flow microfermentor on Pyrex slide at 37C
	A1S_0956		L-aspartate dehydrogenase	1.13	Rumbo-Feal 2013	ATCC 17978	24 hr biofilm, continuous flow microfermentor on Pyrex slide at 37C
	A1S_0980		ferric enterobactin receptor precursor	4.38	Rumbo-Feal 2013	ATCC 17978	24 hr biofilm, continuous flow microfermentor on Pyrex slide at 37C
citN	A1S_1004	ABUW_2892	citrate transporter	2.34906	Penesyan 2019	AB5075-UW	144 hr biofilm, 72 hr continuous flow at 37C to establish biofilm then additional 72 hr mock treatment at 37C
	A1S_1032		hypothetical protein	4.41	Rumbo-Feal 2013	ATCC 17978	24 hr biofilm, continuous flow microfermentor on Pyrex slide at 37C
	A1S_1045	ABUW_2851	Co/Zn/Cd efflux system	3.76346	Penesyan 2019	AB5075-UW	144 hr biofilm, 72 hr continuous flow at 37C to establish biofilm then additional 72 hr mock treatment at 37C
argO	A1S_1046	ABUW_2850	lysine exporter protein ArgO	2.74837	Penesyan 2019	AB5075-UW	144 hr biofilm, 72 hr continuous flow at 37C to establish biofilm then additional 72 hr mock treatment at 37C
rnt	A1S_1065	ABUW_2826	ribonuclease T	2.52998	Penesyan 2019	AB5075-UW	144 hr biofilm, 72 hr continuous flow at 37C to establish biofilm then additional 72 hr mock treatment at 37C
pyrC	A1S_1066	ABUW_2825	dihydroorotase, homodimeric type	2.387	Penesyan 2019	AB5075-UW	144 hr biofilm, 72 hr continuous flow at 37C to establish biofilm then additional 72 hr mock treatment at 37C
argG	A1S_1068	ABUW_2823	argininosuccinate synthase	2.59557	Penesyan 2019	AB5075-UW	144 hr biofilm, 72 hr continuous flow at 37C to establish biofilm then additional 72 hr mock treatment at 37C
	A1S_1077		hypothetical protein	9.41	Rumbo-Feal 2013	ATCC 17978	24 hr biofilm, continuous flow microfermentor on Pyrex slide at 37C
	A1S_1116		vanillate O-demethylase oxygenase subunit	1.03	Rumbo-Feal 2013	ATCC 17978	24 hr biofilm, continuous flow microfermentor on Pyrex slide at 37C
	A1S_1117		MFS superfamily vanillate transporter	2.16	Rumbo-Feal 2013	ATCC 17978	24 hr biofilm, continuous flow microfermentor on Pyrex slide at 37C
	A1S_1130	ABUW_2760	pirin domain protein	2.2475	Penesyan 2019	AB5075-UW	144 hr biofilm, 72 hr continuous flow at 37C to establish biofilm then additional 72 hr mock treatment at 37C
lysC	A1S_1142	ABUW_2749	aspartate kinase	2.09513	Penesyan 2019	AB5075-UW	144 hr biofilm, 72 hr continuous flow at 37C to establish biofilm then additional 72 hr mock treatment at 37C
	A1S_1146		site-specific DNA-methyltransferase	1.41	Rumbo-Feal 2013	ATCC 17978	24 hr biofilm, continuous flow microfermentor on Pyrex slide at 37C
	A1S_1147		DNA methylase-like protein	1.88	Rumbo-Feal 2013	ATCC 17978	24 hr biofilm, continuous flow microfermentor on Pyrex slide at 37C
alaS	A1S_1176	ABUW_2748	alanyl-tRNA synthetase	2.16586	Penesyan 2019	AB5075-UW	144 hr biofilm, 72 hr continuous flow at 37C to establish biofilm then additional 72 hr mock treatment at 37C
hisZ	A1S_1178	ABUW_2746	ATP phosphoribosyltransferase regulatory subunit	2.00713	Penesyan 2019	AB5075-UW	144 hr biofilm, 72 hr continuous flow at 37C to establish biofilm then additional 72 hr mock treatment at 37C
purA	A1S_1179	ABUW_2745	adenylosuccinate synthetase	2.54557	Penesyan 2019	AB5075-UW	144 hr biofilm, 72 hr continuous flow at 37C to establish biofilm then additional 72 hr mock treatment at 37C
trmB	A1S_1196	ABUW_2727	tRNA (guanine-N(7)-)-methyltransferase	2.69766	Penesyan 2019	AB5075-UW	144 hr biofilm, 72 hr continuous flow at 37C to establish biofilm then additional 72 hr mock treatment at 37C
	A1S_1224	ABUW_2696	transposase	2.33606	Penesyan 2019	AB5075-UW	144 hr biofilm, 72 hr continuous flow at 37C to establish biofilm then additional 72 hr mock treatment at 37C
csp2	A1S_1228	ABUW_2513	cold-shock DNA-binding domain protein	2.61527	Penesyan 2019	AB5075-UW	144 hr biofilm, 72 hr continuous flow at 37C to establish biofilm then additional 72 hr mock treatment at 37C
cysS	A1S_1235	ABUW_2650	cysteinyl-tRNA synthetase	2.35523	Penesyan 2019	AB5075-UW	144 hr biofilm, 72 hr continuous flow at 37C to establish biofilm then additional 72 hr mock treatment at 37C
	A1S_1248	ABUW_2637	hypothetical protein	2.01271	Penesyan 2019	AB5075-UW	144 hr biofilm, 72 hr continuous flow at 37C to establish biofilm then additional 72 hr mock treatment at 37C
	A1S_1266		hypothetical protein	1.09	Rumbo-Feal 2013	ATCC 17978	24 hr biofilm, continuous flow microfermentor on Pyrex slide at 37C
	A1S_1267	ABUW_2606	glycoside hydrolase/deacetylase family protein	2.66418	Penesyan 2019	AB5075-UW	144 hr biofilm, 72 hr continuous flow at 37C to establish biofilm then additional 72 hr mock treatment at 37C
	A1S_1268	ABUW_2605	hypothetical protein	2.89944	Penesyan 2019	AB5075-UW	144 hr biofilm, 72 hr continuous flow at 37C to establish biofilm then additional 72 hr mock treatment at 37C
	A1S_1269	ABUW_2604	allophanate hydrolase	3.78039	Penesyan 2019	AB5075-UW	144 hr biofilm, 72 hr continuous flow at 37C to establish biofilm then additional 72 hr mock treatment at 37C
bccA	A1S_1270	ABUW_2603	carbamoyl-phosphate synthase	3.07289	Penesyan 2019	AB5075-UW	144 hr biofilm, 72 hr continuous flow at 37C to establish biofilm then additional 72 hr mock treatment at 37C
	A1S_1278		allophanate hydrolase subunit 2	20.35	Rumbo-Feal 2013	ATCC 17978	24 hr biofilm, continuous flow microfermentor on Pyrex slide at 37C
	A1S_1278		allophanate hydrolase subunit 2	from zero to 20.35**	Rumbo-Feal 2013	ATCC 17978	24 hr biofilm, continuous flow microfermentor on Pyrex slide at 37C
	A1S_1293		hypothetical protein	15.25	Rumbo-Feal 2013	ATCC 17978	24 hr biofilm, continuous flow microfermentor on Pyrex slide at 37C
	A1S_1297	ABUW_2577	type VI secretion system lysozyme-related protein	2.86984	Penesyan 2019	AB5075-UW	144 hr biofilm, 72 hr continuous flow at 37C to establish biofilm then additional 72 hr mock treatment at 37C
	A1S_1316		major facilitator superfamily transporter cyanate permease	14.4	Rumbo-Feal 2013	ATCC 17978	24 hr biofilm, continuous flow microfermentor on Pyrex slide at 37C
	A1S_1319		hypothetical protein	22.56	Rumbo-Feal 2013	ATCC 17978	24 hr biofilm, continuous flow microfermentor on Pyrex slide at 37C
	A1S_1335		bifunctional aldehyde dehydrogenase/enoyl-CoA hydratase	21.33	Rumbo-Feal 2013	ATCC 17978	24 hr biofilm, continuous flow microfermentor on Pyrex slide at 37C
paaA	A1S_1336		phenylacetate-CoA oxygenase subunit PaaA	93.43	Rumbo-Feal 2013	ATCC 17978	24 hr biofilm, continuous flow microfermentor on Pyrex slide at 37C
paaB	A1S_1337		phenylacetate-CoA oxygenase subunit PaaB	22.63	Rumbo-Feal 2013	ATCC 17978	24 hr biofilm, continuous flow microfermentor on Pyrex slide at 37C
	A1S_1338		hypothetical protein	34.73	Rumbo-Feal 2013	ATCC 17978	24 hr biofilm, continuous flow microfermentor on Pyrex slide at 37C
paaJ	A1S_1339		phenylacetate-CoA oxygenase PaaJ subunit	196.37	Rumbo-Feal 2013	ATCC 17978	24 hr biofilm, continuous flow microfermentor on Pyrex slide at 37C
paaK	A1S_1340		phenylacetate-CoA oxygenase/reductase PaaK subunit	161.34	Rumbo-Feal 2013	ATCC 17978	24 hr biofilm, continuous flow microfermentor on Pyrex slide at 37C
	A1S_1341		enoyl-CoA hydratase/carnithine racemase	28.43	Rumbo-Feal 2013	ATCC 17978	24 hr biofilm, continuous flow microfermentor on Pyrex slide at 37C
	A1S_1344		thiolase	14.31	Rumbo-Feal 2013	ATCC 17978	24 hr biofilm, continuous flow microfermentor on Pyrex slide at 37C
	A1S_1357		alanine racemase	4.59	Rumbo-Feal 2013	ATCC 17978	24 hr biofilm, continuous flow microfermentor on Pyrex slide at 37C
	A1S_1366		transporter LysE family	1.03	Rumbo-Feal 2013	ATCC 17978	24 hr biofilm, continuous flow microfermentor on Pyrex slide at 37C
	A1S_1370		oxidoreductase	2.67	Rumbo-Feal 2013	ATCC 17978	24 hr biofilm, continuous flow microfermentor on Pyrex slide at 37C
	A1S_1376		acyl-CoA dehydrogenase	11.34	Rumbo-Feal 2013	ATCC 17978	24 hr biofilm, continuous flow microfermentor on Pyrex slide at 37C
	A1S_1377		acrR family transcriptional regulator	4.28	Rumbo-Feal 2013	ATCC 17978	24 hr biofilm, continuous flow microfermentor on Pyrex slide at 37C
	A1S_1385		hypothetical protein	9.16	Rumbo-Feal 2013	ATCC 17978	24 hr biofilm, continuous flow microfermentor on Pyrex slide at 37C
	A1S_1454		transmembrane arsenate pump protein	54.33	Rumbo-Feal 2013	ATCC 17978	24 hr biofilm, continuous flow microfermentor on Pyrex slide at 37C
	A1S_1464	ABUW_2361	RNA methyltransferase, TrmH family, group 1	2.36433	Penesyan 2019	AB5075-UW	144 hr biofilm, 72 hr continuous flow at 37C to establish biofilm then additional 72 hr mock treatment at 37C
ychF	A1S_1481	ABUW_2342	GTP-binding protein YchF	2.47062	Penesyan 2019	AB5075-UW	144 hr biofilm, 72 hr continuous flow at 37C to establish biofilm then additional 72 hr mock treatment at 37C
yyaM	A1S_1505	ABUW_2316	hypothetical protein	3.01276	Penesyan 2019	AB5075-UW	144 hr biofilm, 72 hr continuous flow at 37C to establish biofilm then additional 72 hr mock treatment at 37C
	A1S_1507	LH92_RS08835	Fimbrial protein	1.9484	Alvarez-Fraga 2016	MAR002	24 hr biofilm, continuous flow microfermentor on Pyrex slide at 37C
	A1S_1507		fimbrial protein	17.73	Rumbo-Feal 2013	ATCC 17978	24 hr biofilm, continuous flow microfermentor on Pyrex slide at 37C
	A1S_1507	LH92_RS07535	Fimbrial protein	19	Alvarez-Fraga 2016	MAR002	24 hr biofilm, continuous flow microfermentor on Pyrex slide at 37C
papC	A1S_1508	BJAB0868_01667	P pilus assembly protein, PapC	29.85	Li 2016	BJAB0868	96 hr biofilm, continuous flow microfermentor at 37C
	A1S_1510	LH92_RS08850	Fimbrial protein	4.12121	Alvarez-Fraga 2016	MAR002	24 hr biofilm, continuous flow microfermentor on Pyrex slide at 37C
	A1S_1510	LH92_RS07550	Fimbrial protein	4.43317	Alvarez-Fraga 2016	MAR002	24 hr biofilm, continuous flow microfermentor on Pyrex slide at 37C
metK	A1S_1519	ABUW_2296	methionine adenosyltransferase	2.17465	Penesyan 2019	AB5075-UW	144 hr biofilm, 72 hr continuous flow at 37C to establish biofilm then additional 72 hr mock treatment at 37C
	A1S_1541		hypothetical protein	8.27	Rumbo-Feal 2013	ATCC 17978	24 hr biofilm, continuous flow microfermentor on Pyrex slide at 37C
	A1S_1572		30S ribosomal protein S1	1.74	Rumbo-Feal 2013	ATCC 17978	24 hr biofilm, continuous flow microfermentor on Pyrex slide at 37C
rpsA	A1S_1572	ABUW_2242	ribosomal protein S1	2.00029	Penesyan 2019	AB5075-UW	144 hr biofilm, 72 hr continuous flow at 37C to establish biofilm then additional 72 hr mock treatment at 37C
	A1S_1617		30S ribosomal protein S20	4.08	Rumbo-Feal 2013	ATCC 17978	24 hr biofilm, continuous flow microfermentor on Pyrex slide at 37C
	A1S_1622		hypothetical protein	1.13	Rumbo-Feal 2013	ATCC 17978	24 hr biofilm, continuous flow microfermentor on Pyrex slide at 37C
hscA	A1S_1628	ABUW_2206	Fe-S protein assembly chaperone HscA	2.59067	Penesyan 2019	AB5075-UW	144 hr biofilm, 72 hr continuous flow at 37C to establish biofilm then additional 72 hr mock treatment at 37C
iscS	A1S_1633	ABUW_2202	cysteine desulfurase IscS	3.63846	Penesyan 2019	AB5075-UW	144 hr biofilm, 72 hr continuous flow at 37C to establish biofilm then additional 72 hr mock treatment at 37C
iscR	A1S_1634	ABUW_2201	iscRSUA operon repressor	3.80037	Penesyan 2019	AB5075-UW	144 hr biofilm, 72 hr continuous flow at 37C to establish biofilm then additional 72 hr mock treatment at 37C
	A1S_1637		DNA-binding protein HU-beta	1.13	Rumbo-Feal 2013	ATCC 17978	24 hr biofilm, continuous flow microfermentor on Pyrex slide at 37C
	A1S_1657		siderophore biosynthesis protein	13.61	Rumbo-Feal 2013	ATCC 17978	24 hr biofilm, continuous flow microfermentor on Pyrex slide at 37C
	A1S_1687		transcriptional regulator	1.84	Rumbo-Feal 2013	ATCC 17978	24 hr biofilm, continuous flow microfermentor on Pyrex slide at 37C
	A1S_1690	ABUW_2140	AAA ATPase family protein	3.85143	Penesyan 2019	AB5075-UW	144 hr biofilm, 72 hr continuous flow at 37C to establish biofilm then additional 72 hr mock treatment at 37C
	A1S_1699		pyruvate/2-oxoglutarate dehydrogenase complex	3.28	Rumbo-Feal 2013	ATCC 17978	24 hr biofilm, continuous flow microfermentor on Pyrex slide at 37C
	A1S_1731		acetoacetyl-CoA transferase subunit beta	29.63	Rumbo-Feal 2013	ATCC 17978	24 hr biofilm, continuous flow microfermentor on Pyrex slide at 37C
	A1S_1732		acetoacetyl-CoA transferase subunit alpha	78.74	Rumbo-Feal 2013	ATCC 17978	24 hr biofilm, continuous flow microfermentor on Pyrex slide at 37C
	A1S_1736		hypothetical protein	6.21	Rumbo-Feal 2013	ATCC 17978	24 hr biofilm, continuous flow microfermentor on Pyrex slide at 37C
adeB	A1S_1750	ABUW_1975	multidrug efflux protein AdeB	2.8837	Penesyan 2019	AB5075-UW	144 hr biofilm, 72 hr continuous flow at 37C to establish biofilm then additional 72 hr mock treatment at 37C
AdeA	A1S_1751		AdeA membrane fusion protein	2.34	Rumbo-Feal 2013	ATCC 17978	24 hr biofilm, continuous flow microfermentor on Pyrex slide at 37C
adeA	A1S_1751	ABUW_1974	multidrug efflux protein AdeA	4.05245	Penesyan 2019	AB5075-UW	144 hr biofilm, 72 hr continuous flow at 37C to establish biofilm then additional 72 hr mock treatment at 37C
AdeT	A1S_1755		AdeT	17.27	Rumbo-Feal 2013	ATCC 17978	24 hr biofilm, continuous flow microfermentor on Pyrex slide at 37C
adeT	A1S_1755	BJAB0868_02074	AdeT	18.29	Li 2016	BJAB0868	96 hr biofilm, continuous flow microfermentor at 37C
adeT	A1S_1755		RND efflux pump AdeT	from zero to 17.27**	Rumbo-Feal 2013	ATCC 17978	24 hr biofilm, continuous flow microfermentor on Pyrex slide at 37C
	A1S_1763		transcriptional regulator	1.5	Rumbo-Feal 2013	ATCC 17978	24 hr biofilm, continuous flow microfermentor on Pyrex slide at 37C
pcaF1	A1S_1893	ABUW_1833	beta-ketoadipyl CoA thiolase	2.19734	Penesyan 2019	AB5075-UW	144 hr biofilm, 72 hr continuous flow at 37C to establish biofilm then additional 72 hr mock treatment at 37C
eno	A1S_1898	ABUW_1827	phosphopyruvate hydratase (enolase)	2.26888	Penesyan 2019	AB5075-UW	144 hr biofilm, 72 hr continuous flow at 37C to establish biofilm then additional 72 hr mock treatment at 37C
pyrG	A1S_1900	ABUW_1825	CTP synthase	2.16998	Penesyan 2019	AB5075-UW	144 hr biofilm, 72 hr continuous flow at 37C to establish biofilm then additional 72 hr mock treatment at 37C
	A1S_1932		hypothetical protein	1.88	Rumbo-Feal 2013	ATCC 17978	24 hr biofilm, continuous flow microfermentor on Pyrex slide at 37C
recX	A1S_1963	ABUW_1747	regulatory protein RecX	2.67479	Penesyan 2019	AB5075-UW	144 hr biofilm, 72 hr continuous flow at 37C to establish biofilm then additional 72 hr mock treatment at 37C
	A1S_1965		UDP-N-acetylglucosamine acyltransferase	3.57	Rumbo-Feal 2013	ATCC 17978	24 hr biofilm, continuous flow microfermentor on Pyrex slide at 37C
dxr	A1S_1971	ABUW_1739	1-deoxy-D-xylulose 5-phosphate reductoisomerase	2.27805	Penesyan 2019	AB5075-UW	144 hr biofilm, 72 hr continuous flow at 37C to establish biofilm then additional 72 hr mock treatment at 37C
cdsA	A1S_1972	ABUW_1738	phosphatidate cytidylyltransferase	2.07983	Penesyan 2019	AB5075-UW	144 hr biofilm, 72 hr continuous flow at 37C to establish biofilm then additional 72 hr mock treatment at 37C
	A1S_1976	ABUW_1734	hypothetical protein	2.23386	Penesyan 2019	AB5075-UW	144 hr biofilm, 72 hr continuous flow at 37C to establish biofilm then additional 72 hr mock treatment at 37C
	A1S_1979	ABUW_1731	transcriptional regulator, TetR family	2.56787	Penesyan 2019	AB5075-UW	144 hr biofilm, 72 hr continuous flow at 37C to establish biofilm then additional 72 hr mock treatment at 37C
	A1S_2029		hypothetical protein	11.3	Rumbo-Feal 2013	ATCC 17978	24 hr biofilm, continuous flow microfermentor on Pyrex slide at 37C
	A1S_2042		transcriptional regulator (TetR family)	2.72	Rumbo-Feal 2013	ATCC 17978	24 hr biofilm, continuous flow microfermentor on Pyrex slide at 37C
	A1S_2088	LH92_RS10905	Hypothetical protein	3.375	Alvarez-Fraga 2016	MAR002	24 hr biofilm, continuous flow microfermentor on Pyrex slide at 37C
	A1S_2091		Putative exported protein	10	Alvarez-Fraga 2016	ATCC 17978	24 hr biofilm, continuous flow microfermentor on Pyrex slide at 37C
	A1S_2091		hypothetical protein	24.78	Rumbo-Feal 2013	ATCC 17978	24 hr biofilm, continuous flow microfermentor on Pyrex slide at 37C
	A1S_2091	LH92_RS10920	Putative exported protein (FimA-like)	24.9778	Alvarez-Fraga 2016	MAR002	24 hr biofilm, continuous flow microfermentor on Pyrex slide at 37C
	A1S_2093		hypothetical protein	1.13	Rumbo-Feal 2013	ATCC 17978	24 hr biofilm, continuous flow microfermentor on Pyrex slide at 37C
	A1S_2098		alcohol dehydrogenase	13.14	Rumbo-Feal 2013	ATCC 17978	24 hr biofilm, continuous flow microfermentor on Pyrex slide at 37C
	A1S_2102		aldehyde dehydrogenase 1	2.59	Rumbo-Feal 2013	ATCC 17978	24 hr biofilm, continuous flow microfermentor on Pyrex slide at 37C
acnB	A1S_2128	ABUW_1593	aconitate hydratase 2	2.36916	Penesyan 2019	AB5075-UW	144 hr biofilm, 72 hr continuous flow at 37C to establish biofilm then additional 72 hr mock treatment at 37C
	A1S_2136	ABUW_1586	glutamine synthetase	4.20209	Penesyan 2019	AB5075-UW	144 hr biofilm, 72 hr continuous flow at 37C to establish biofilm then additional 72 hr mock treatment at 37C
	A1S_2148		acetyl-CoA synthetase/AMP-(fatty) acid ligase	12.9	Rumbo-Feal 2013	ATCC 17978	24 hr biofilm, continuous flow microfermentor on Pyrex slide at 37C
	A1S_2149		acyl CoA dehydrogenase oxidoreductase protein	8.68	Rumbo-Feal 2013	ATCC 17978	24 hr biofilm, continuous flow microfermentor on Pyrex slide at 37C
	A1S_2150		oxidoreductase	5.52	Rumbo-Feal 2013	ATCC 17978	24 hr biofilm, continuous flow microfermentor on Pyrex slide at 37C
hemK	A1S_2153	ABUW_1568	protein methylase, HemK family	2.69529	Penesyan 2019	AB5075-UW	144 hr biofilm, 72 hr continuous flow at 37C to establish biofilm then additional 72 hr mock treatment at 37C
	A1S_2164		phosphoenolpyruvate synthase	1.04	Rumbo-Feal 2013	ATCC 17978	24 hr biofilm, continuous flow microfermentor on Pyrex slide at 37C
cyoB	A1S_2167	ABUW_1552	cytochrome O ubiquinol oxidase, subunit I	2.22879	Penesyan 2019	AB5075-UW	144 hr biofilm, 72 hr continuous flow at 37C to establish biofilm then additional 72 hr mock treatment at 37C
cyoE	A1S_2170	ABUW_1549	protoheme IX farnesyltransferase	3.2129	Penesyan 2019	AB5075-UW	144 hr biofilm, 72 hr continuous flow at 37C to establish biofilm then additional 72 hr mock treatment at 37C
rpsF	A1S_2171	ABUW_1548	ribosomal protein S6	2.74103	Penesyan 2019	AB5075-UW	144 hr biofilm, 72 hr continuous flow at 37C to establish biofilm then additional 72 hr mock treatment at 37C
rpsR	A1S_2172	ABUW_1547	ribosomal protein S18	3.32835	Penesyan 2019	AB5075-UW	144 hr biofilm, 72 hr continuous flow at 37C to establish biofilm then additional 72 hr mock treatment at 37C
rplI	A1S_2173	ABUW_1546	ribosomal protein L9	3.24079	Penesyan 2019	AB5075-UW	144 hr biofilm, 72 hr continuous flow at 37C to establish biofilm then additional 72 hr mock treatment at 37C
dnaB	A1S_2174	ABUW_1545	replicative DNA helicase	2.10959	Penesyan 2019	AB5075-UW	144 hr biofilm, 72 hr continuous flow at 37C to establish biofilm then additional 72 hr mock treatment at 37C
gidA	A1S_2182	ABUW_1537	glucose inhibited division protein A	3.84729	Penesyan 2019	AB5075-UW	144 hr biofilm, 72 hr continuous flow at 37C to establish biofilm then additional 72 hr mock treatment at 37C
	A1S_2196	ABUW_1525	C4-dicarboxylate transport protein	2.72793	Penesyan 2019	AB5075-UW	144 hr biofilm, 72 hr continuous flow at 37C to establish biofilm then additional 72 hr mock treatment at 37C
csuD	A1S_2214		protein CsuD	180.04	Rumbo-Feal 2013	ATCC 17978	24 hr biofilm, continuous flow microfermentor on Pyrex slide at 37C
csuD	A1S_2214	BJAB0868_02455	CsuD	189.24	Li 2016	BJAB0868	96 hr biofilm, continuous flow microfermentor at 37C
csuC	A1S_2215		protein CsuC	201.23	Rumbo-Feal 2013	ATCC 17978	24 hr biofilm, continuous flow microfermentor on Pyrex slide at 37C
csuC	A1S_2215	BJAB0868_02466	CsuC	205.13	Li 2016	BJAB0868	96 hr biofilm, continuous flow microfermentor at 37C
csuB	A1S_2216		CsuB	11.96	Rumbo-Feal 2013	ATCC 17978	24 hr biofilm, continuous flow microfermentor on Pyrex slide at 37C
csuB	A1S_2216	BJAB0868_02457	CsuB	12.23	Li 2016	BJAB0868	96 hr biofilm, continuous flow microfermentor at 37C
csuA	A1S_2217		CsuA	3.84	Rumbo-Feal 2013	ATCC 17978	24 hr biofilm, continuous flow microfermentor on Pyrex slide at 37C
csuA	A1S_2218	LH92_RS11540	CsuA/B	0.33529	Alvarez-Fraga 2016	MAR002	24 hr biofilm, continuous flow microfermentor on Pyrex slide at 37C
csuA	A1S_2218	BJAB0868_02458	CsuA	34.45	Li 2016	BJAB0868	96 hr biofilm, continuous flow microfermentor at 37C
csuA/B	A1S_2218		protein CsuA/B	164.4	Rumbo-Feal 2013	ATCC 17978	24 hr biofilm, continuous flow microfermentor on Pyrex slide at 37C
	A1S_2244	ABUW_1453	metalloendopeptidase	2.09324	Penesyan 2019	AB5075-UW	144 hr biofilm, 72 hr continuous flow at 37C to establish biofilm then additional 72 hr mock treatment at 37C
	A1S_2246	ABUW_1451	GatB/Yqey domain protein	2.58167	Penesyan 2019	AB5075-UW	144 hr biofilm, 72 hr continuous flow at 37C to establish biofilm then additional 72 hr mock treatment at 37C
	A1S_2261		cold shock protein	5.09	Rumbo-Feal 2013	ATCC 17978	24 hr biofilm, continuous flow microfermentor on Pyrex slide at 37C
	A1S_2289		signal peptide	20.61	Rumbo-Feal 2013	ATCC 17978	24 hr biofilm, continuous flow microfermentor on Pyrex slide at 37C
glyA	A1S_2307	ABUW_1333	glycine hydroxymethyltransferase	2.43149	Penesyan 2019	AB5075-UW	144 hr biofilm, 72 hr continuous flow at 37C to establish biofilm then additional 72 hr mock treatment at 37C
	A1S_2311	ABUW_1248	ABC transporter ATP-binding protein	2.00819	Penesyan 2019	AB5075-UW	144 hr biofilm, 72 hr continuous flow at 37C to establish biofilm then additional 72 hr mock treatment at 37C
rlpA	A1S_2317	ABUW_1242	rare lipoprotein A	3.98816	Penesyan 2019	AB5075-UW	144 hr biofilm, 72 hr continuous flow at 37C to establish biofilm then additional 72 hr mock treatment at 37C
tsf	A1S_2322		elongation factor Ts	1.5	Rumbo-Feal 2013	ATCC 17978	24 hr biofilm, continuous flow microfermentor on Pyrex slide at 37C
tsf	A1S_2322	ABUW_1236	translation elongation factor Ts	2.54483	Penesyan 2019	AB5075-UW	144 hr biofilm, 72 hr continuous flow at 37C to establish biofilm then additional 72 hr mock treatment at 37C
rpsB	A1S_2323	ABUW_1235	ribosomal protein S2	2.83388	Penesyan 2019	AB5075-UW	144 hr biofilm, 72 hr continuous flow at 37C to establish biofilm then additional 72 hr mock treatment at 37C
ahcY	A1S_2334	ABUW_1224	adenosylhomocysteinase	2.62712	Penesyan 2019	AB5075-UW	144 hr biofilm, 72 hr continuous flow at 37C to establish biofilm then additional 72 hr mock treatment at 37C
folE	A1S_2366	ABUW_1195	GTP cyclohydrolase I	2.2209	Penesyan 2019	AB5075-UW	144 hr biofilm, 72 hr continuous flow at 37C to establish biofilm then additional 72 hr mock treatment at 37C
	A1S_2380		acinetobactin biosynthesis protein	8.81	Rumbo-Feal 2013	ATCC 17978	24 hr biofilm, continuous flow microfermentor on Pyrex slide at 37C
BasD	A1S_2382		BasD (iron acquisition systems)	72.89	Rumbo-Feal 2013	ATCC 17978	24 hr biofilm, continuous flow microfermentor on Pyrex slide at 37C
basD	A1S_2382	BJAB0868_02619	BasD	79.98	Li 2016	BJAB0868	96 hr biofilm, continuous flow microfermentor at 37C
	A1S_2385		ferric acinetobactin receptor	6.48	Rumbo-Feal 2013	ATCC 17978	24 hr biofilm, continuous flow microfermentor on Pyrex slide at 37C
	A1S_2386		ferric acinetobactin binding protein	9.1	Rumbo-Feal 2013	ATCC 17978	24 hr biofilm, continuous flow microfermentor on Pyrex slide at 37C
	A1S_2388		putative ferric acinetobactin transport system	1.69	Rumbo-Feal 2013	ATCC 17978	24 hr biofilm, continuous flow microfermentor on Pyrex slide at 37C
	A1S_2390		acinetobactin biosynthesis protein	34.11	Rumbo-Feal 2013	ATCC 17978	24 hr biofilm, continuous flow microfermentor on Pyrex slide at 37C
	A1S_2437	ABUW_1125	hydrolase, NUDIX family	2.03098	Penesyan 2019	AB5075-UW	144 hr biofilm, 72 hr continuous flow at 37C to establish biofilm then additional 72 hr mock treatment at 37C
pstA	A1S_2446	ABUW_1117	phosphate ABC transporter, permease protein	2.5416	Penesyan 2019	AB5075-UW	144 hr biofilm, 72 hr continuous flow at 37C to establish biofilm then additional 72 hr mock treatment at 37C
pstC	A1S_2447	ABUW_1116	phosphate ABC transporter, permease protein (EsvD)	2.33094	Penesyan 2019	AB5075-UW	144 hr biofilm, 72 hr continuous flow at 37C to establish biofilm then additional 72 hr mock treatment at 37C
pstC	A1S_2447		EsvD ABC transporter	7.56	Rumbo-Feal 2013	ATCC 17978	24 hr biofilm, continuous flow microfermentor on Pyrex slide at 37C
	A1S_2449		aromatic amino acid APC transporter	16.58	Rumbo-Feal 2013	ATCC 17978	24 hr biofilm, continuous flow microfermentor on Pyrex slide at 37C
	A1S_2450		pyruvate decarboxylase	8.17	Rumbo-Feal 2013	ATCC 17978	24 hr biofilm, continuous flow microfermentor on Pyrex slide at 37C
	A1S_2452		NAD-dependent aldehyde dehydrogenases	1.71	Rumbo-Feal 2013	ATCC 17978	24 hr biofilm, continuous flow microfermentor on Pyrex slide at 37C
	A1S_2473	ABUW_1079	LysR family transcriptional regulator	2.02705	Penesyan 2019	AB5075-UW	144 hr biofilm, 72 hr continuous flow at 37C to establish biofilm then additional 72 hr mock treatment at 37C
proB	A1S_2497	ABUW_1054	glutamate 5-kinase	2.02668	Penesyan 2019	AB5075-UW	144 hr biofilm, 72 hr continuous flow at 37C to establish biofilm then additional 72 hr mock treatment at 37C
obg	A1S_2498	ABUW_1053	GTP-binding protein Obg/CgtA	2.61345	Penesyan 2019	AB5075-UW	144 hr biofilm, 72 hr continuous flow at 37C to establish biofilm then additional 72 hr mock treatment at 37C
aspC	A1S_2508	ABUW_1043	aspartate aminotransferase A	2.47356	Penesyan 2019	AB5075-UW	144 hr biofilm, 72 hr continuous flow at 37C to establish biofilm then additional 72 hr mock treatment at 37C
lepA	A1S_2522	ABUW_1029	GTP-binding protein LepA	2.12214	Penesyan 2019	AB5075-UW	144 hr biofilm, 72 hr continuous flow at 37C to establish biofilm then additional 72 hr mock treatment at 37C
	A1S_2534		sulfate transport protein	21.12	Rumbo-Feal 2013	ATCC 17978	24 hr biofilm, continuous flow microfermentor on Pyrex slide at 37C
	A1S_2540	ABUW_1013	radical SAM domain protein	3.34851	Penesyan 2019	AB5075-UW	144 hr biofilm, 72 hr continuous flow at 37C to establish biofilm then additional 72 hr mock treatment at 37C
	A1S_2580		23-dihydro-2	1.4	Rumbo-Feal 2013	ATCC 17978	24 hr biofilm, continuous flow microfermentor on Pyrex slide at 37C
purL	A1S_2585	ABUW_1002	phosphoribosylformylglycinamidine synthase	2.27335	Penesyan 2019	AB5075-UW	144 hr biofilm, 72 hr continuous flow at 37C to establish biofilm then additional 72 hr mock treatment at 37C
tolA	A1S_2591	ABUW_0994	tolerance to group A colicins single-stranded filamentous DNA phage	2.28934	Penesyan 2019	AB5075-UW	144 hr biofilm, 72 hr continuous flow at 37C to establish biofilm then additional 72 hr mock treatment at 37C
purM	A1S_2605	ABUW_0981	phosphoribosylformylglycinamidine cyclo-ligase	2.21528	Penesyan 2019	AB5075-UW	144 hr biofilm, 72 hr continuous flow at 37C to establish biofilm then additional 72 hr mock treatment at 37C
purN	A1S_2606	ABUW_0980	phosphoribosylglycinamide formyltransferase	2.0073	Penesyan 2019	AB5075-UW	144 hr biofilm, 72 hr continuous flow at 37C to establish biofilm then additional 72 hr mock treatment at 37C
	A1S_2654	ABUW_0928	lytic transglycosylase, catalytic	3.9361	Penesyan 2019	AB5075-UW	144 hr biofilm, 72 hr continuous flow at 37C to establish biofilm then additional 72 hr mock treatment at 37C
pckG	A1S_2668	ABUW_0913	phosphoenolpyruvate carboxykinase	2.87134	Penesyan 2019	AB5075-UW	144 hr biofilm, 72 hr continuous flow at 37C to establish biofilm then additional 72 hr mock treatment at 37C
folD	A1S_2674	ABUW_0907	methenyltetrahydrofolate cyclohydrolase	2.04266	Penesyan 2019	AB5075-UW	144 hr biofilm, 72 hr continuous flow at 37C to establish biofilm then additional 72 hr mock treatment at 37C
carA	A1S_2686	ABUW_0894	carbamoyl-phosphate synthase, small subunit	4.12226	Penesyan 2019	AB5075-UW	144 hr biofilm, 72 hr continuous flow at 37C to establish biofilm then additional 72 hr mock treatment at 37C
carB	A1S_2687	ABUW_0893	carbamoyl-phosphate synthase, large subunit	3.51696	Penesyan 2019	AB5075-UW	144 hr biofilm, 72 hr continuous flow at 37C to establish biofilm then additional 72 hr mock treatment at 37C
	A1S_2696		hypothetical protein	1.35	Rumbo-Feal 2013	ATCC 17978	24 hr biofilm, continuous flow microfermentor on Pyrex slide at 37C
gltA	A1S_2710	ABUW_0867	citrate synthase I	3.32532	Penesyan 2019	AB5075-UW	144 hr biofilm, 72 hr continuous flow at 37C to establish biofilm then additional 72 hr mock treatment at 37C
sdhA	A1S_2713	ABUW_0870	succinate dehydrogenase, flavoprotein subunit	2.06471	Penesyan 2019	AB5075-UW	144 hr biofilm, 72 hr continuous flow at 37C to establish biofilm then additional 72 hr mock treatment at 37C
sucA	A1S_2715	ABUW_0872	2-oxoglutarate dehydrogenase, E1 component	2.00753	Penesyan 2019	AB5075-UW	144 hr biofilm, 72 hr continuous flow at 37C to establish biofilm then additional 72 hr mock treatment at 37C
lpdA1	A1S_2717	ABUW_0874	dihydrolipoamide dehydrogenase	2.3879	Penesyan 2019	AB5075-UW	144 hr biofilm, 72 hr continuous flow at 37C to establish biofilm then additional 72 hr mock treatment at 37C
	A1S_2718		succinyl-CoA synthetase subunit beta	1.14	Rumbo-Feal 2013	ATCC 17978	24 hr biofilm, continuous flow microfermentor on Pyrex slide at 37C
	A1S_2719		succinyl-CoA synthetase subunit alpha	1.07	Rumbo-Feal 2013	ATCC 17978	24 hr biofilm, continuous flow microfermentor on Pyrex slide at 37C
rpmA	A1S_2730	ABUW_0849	ribosomal protein L27	3.24757	Penesyan 2019	AB5075-UW	144 hr biofilm, 72 hr continuous flow at 37C to establish biofilm then additional 72 hr mock treatment at 37C
rplU	A1S_2731	ABUW_0848	ribosomal protein L21	3.21277	Penesyan 2019	AB5075-UW	144 hr biofilm, 72 hr continuous flow at 37C to establish biofilm then additional 72 hr mock treatment at 37C
	A1S_2753		hypothetical protein	1.66	Rumbo-Feal 2013	ATCC 17978	24 hr biofilm, continuous flow microfermentor on Pyrex slide at 37C
maf1	A1S_2778	ABUW_0718	septum formation protein Maf	2.07326	Penesyan 2019	AB5075-UW	144 hr biofilm, 72 hr continuous flow at 37C to establish biofilm then additional 72 hr mock treatment at 37C
gatA	A1S_2783	ABUW_0713	glutamyl-tRNA(Gln) amidotransferase, A subunit	2.20862	Penesyan 2019	AB5075-UW	144 hr biofilm, 72 hr continuous flow at 37C to establish biofilm then additional 72 hr mock treatment at 37C
typA	A1S_2835	ABUW_0655	GTP-binding protein TypA/BipA	2.6653	Penesyan 2019	AB5075-UW	144 hr biofilm, 72 hr continuous flow at 37C to establish biofilm then additional 72 hr mock treatment at 37C
	A1S_2839	ABUW_0651	hypothetical protein	2.94085	Penesyan 2019	AB5075-UW	144 hr biofilm, 72 hr continuous flow at 37C to establish biofilm then additional 72 hr mock treatment at 37C
ompA	A1S_2840	BJAB0868_03135	OmpA	0.67	Li 2016	BJAB0868	96 hr biofilm, continuous flow microfermentor at 37C
cysI	A1S_2846	ABUW_0643	sulfite reductase	2.43126	Penesyan 2019	AB5075-UW	144 hr biofilm, 72 hr continuous flow at 37C to establish biofilm then additional 72 hr mock treatment at 37C
	A1S_2885	ABUW_0607	hypothetical protein	2.0216	Penesyan 2019	AB5075-UW	144 hr biofilm, 72 hr continuous flow at 37C to establish biofilm then additional 72 hr mock treatment at 37C
	A1S_2889	ABUW_0603	hypothetical protein	4.14321	Penesyan 2019	AB5075-UW	144 hr biofilm, 72 hr continuous flow at 37C to establish biofilm then additional 72 hr mock treatment at 37C
	A1S_2889		signal peptide	46.5	Rumbo-Feal 2013	ATCC 17978	24 hr biofilm, continuous flow microfermentor on Pyrex slide at 37C
	A1S_2893		hypothetical protein	64.83	Rumbo-Feal 2013	ATCC 17978	24 hr biofilm, continuous flow microfermentor on Pyrex slide at 37C
aspS	A1S_2894	ABUW_0598	aspartyl-tRNA synthetase	2.17534	Penesyan 2019	AB5075-UW	144 hr biofilm, 72 hr continuous flow at 37C to establish biofilm then additional 72 hr mock treatment at 37C
tgt	A1S_2912	ABUW_0533	queuine tRNA-ribosyltransferase	2.82611	Penesyan 2019	AB5075-UW	144 hr biofilm, 72 hr continuous flow at 37C to establish biofilm then additional 72 hr mock treatment at 37C
secD	A1S_2914	ABUW_0531	protein-export membrane protein SecD	2.04418	Penesyan 2019	AB5075-UW	144 hr biofilm, 72 hr continuous flow at 37C to establish biofilm then additional 72 hr mock treatment at 37C
ppiA	A1S_2955	ABUW_3872	peptidyl-prolyl cis-trans isomerase	3.08896	Penesyan 2019	AB5075-UW	144 hr biofilm, 72 hr continuous flow at 37C to establish biofilm then additional 72 hr mock treatment at 37C
purK	A1S_2964	ABUW_3885	phosphoribosylaminoimidazole carboxylase, ATPase subunit	2.29222	Penesyan 2019	AB5075-UW	144 hr biofilm, 72 hr continuous flow at 37C to establish biofilm then additional 72 hr mock treatment at 37C
purE	A1S_2965	ABUW_3886	phosphoribosylaminoimidazole carboxylase, catalytic subunit	2.7534	Penesyan 2019	AB5075-UW	144 hr biofilm, 72 hr continuous flow at 37C to establish biofilm then additional 72 hr mock treatment at 37C
oxaA	A1S_2980	ABUW_3903	inner membrane protein OxaA	3.53395	Penesyan 2019	AB5075-UW	144 hr biofilm, 72 hr continuous flow at 37C to establish biofilm then additional 72 hr mock treatment at 37C
	A1S_2982	ABUW_3904	hypothetical protein	4.10506	Penesyan 2019	AB5075-UW	144 hr biofilm, 72 hr continuous flow at 37C to establish biofilm then additional 72 hr mock treatment at 37C
rnpA	A1S_2983	ABUW_3905	ribonuclease P protein component	3.13182	Penesyan 2019	AB5075-UW	144 hr biofilm, 72 hr continuous flow at 37C to establish biofilm then additional 72 hr mock treatment at 37C
rpmH	A1S_2984	ABUW_3906	ribosomal protein L34	2.83881	Penesyan 2019	AB5075-UW	144 hr biofilm, 72 hr continuous flow at 37C to establish biofilm then additional 72 hr mock treatment at 37C
rplM	A1S_3000	ABUW_0494	ribosomal protein L13	3.9729	Penesyan 2019	AB5075-UW	144 hr biofilm, 72 hr continuous flow at 37C to establish biofilm then additional 72 hr mock treatment at 37C
rpsI	A1S_3001	ABUW_0493	ribosomal protein S9	3.93458	Penesyan 2019	AB5075-UW	144 hr biofilm, 72 hr continuous flow at 37C to establish biofilm then additional 72 hr mock treatment at 37C
mdh	A1S_3025	ABUW_0467	malate dehydrogenase	2.97983	Penesyan 2019	AB5075-UW	144 hr biofilm, 72 hr continuous flow at 37C to establish biofilm then additional 72 hr mock treatment at 37C
	A1S_3043		hypothetical protein	3.91	Rumbo-Feal 2013	ATCC 17978	24 hr biofilm, continuous flow microfermentor on Pyrex slide at 37C
rplQ	A1S_3055		50S ribosomal protein L17	2.54	Rumbo-Feal 2013	ATCC 17978	24 hr biofilm, continuous flow microfermentor on Pyrex slide at 37C
rplQ	A1S_3055	ABUW_0432	ribosomal protein L17	5.48538	Penesyan 2019	AB5075-UW	144 hr biofilm, 72 hr continuous flow at 37C to establish biofilm then additional 72 hr mock treatment at 37C
rpoA	A1S_3056		DNA-directed RNA polymerase subunit alpha	1.89	Rumbo-Feal 2013	ATCC 17978	24 hr biofilm, continuous flow microfermentor on Pyrex slide at 37C
rpoA	A1S_3056	ABUW_0431	DNA-directed RNA polymerase, alpha subunit	5.35522	Penesyan 2019	AB5075-UW	144 hr biofilm, 72 hr continuous flow at 37C to establish biofilm then additional 72 hr mock treatment at 37C
rpsD	A1S_3057		30S ribosomal protein S4	1.89	Rumbo-Feal 2013	ATCC 17978	24 hr biofilm, continuous flow microfermentor on Pyrex slide at 37C
rpsD	A1S_3057	ABUW_0430	ribosomal protein S4	5.18361	Penesyan 2019	AB5075-UW	144 hr biofilm, 72 hr continuous flow at 37C to establish biofilm then additional 72 hr mock treatment at 37C
rpsK	A1S_3058		30S ribosomal protein S11	2	Rumbo-Feal 2013	ATCC 17978	24 hr biofilm, continuous flow microfermentor on Pyrex slide at 37C
rpsK	A1S_3058	ABUW_0429	ribosomal protein S11	5.13138	Penesyan 2019	AB5075-UW	144 hr biofilm, 72 hr continuous flow at 37C to establish biofilm then additional 72 hr mock treatment at 37C
rpsM	A1S_3059	ABUW_0428	ribosomal protein S13	4.85103	Penesyan 2019	AB5075-UW	144 hr biofilm, 72 hr continuous flow at 37C to establish biofilm then additional 72 hr mock treatment at 37C
rpmJ	A1S_3060	ABUW_0427	ribosomal protein L36	2.81073	Penesyan 2019	AB5075-UW	144 hr biofilm, 72 hr continuous flow at 37C to establish biofilm then additional 72 hr mock treatment at 37C
secY	A1S_3061		preprotein translocase subunit SecY	2.64	Rumbo-Feal 2013	ATCC 17978	24 hr biofilm, continuous flow microfermentor on Pyrex slide at 37C
secY	A1S_3061	ABUW_0426	preprotein translocase, SecY subunit	4.34725	Penesyan 2019	AB5075-UW	144 hr biofilm, 72 hr continuous flow at 37C to establish biofilm then additional 72 hr mock treatment at 37C
rplO	A1S_3062		50S ribosomal protein L15	2.79	Rumbo-Feal 2013	ATCC 17978	24 hr biofilm, continuous flow microfermentor on Pyrex slide at 37C
rplO	A1S_3062	ABUW_0425	ribosomal protein L15	4.16967	Penesyan 2019	AB5075-UW	144 hr biofilm, 72 hr continuous flow at 37C to establish biofilm then additional 72 hr mock treatment at 37C
rpmD	A1S_3063		50S ribosomal protein L30	2.54	Rumbo-Feal 2013	ATCC 17978	24 hr biofilm, continuous flow microfermentor on Pyrex slide at 37C
rpmD	A1S_3063	ABUW_0424	ribosomal protein L30	4.40361	Penesyan 2019	AB5075-UW	144 hr biofilm, 72 hr continuous flow at 37C to establish biofilm then additional 72 hr mock treatment at 37C
rpsE	A1S_3064		30S ribosomal protein S5	2.97	Rumbo-Feal 2013	ATCC 17978	24 hr biofilm, continuous flow microfermentor on Pyrex slide at 37C
rpsE	A1S_3064	ABUW_0423	ribosomal protein S5	4.54165	Penesyan 2019	AB5075-UW	144 hr biofilm, 72 hr continuous flow at 37C to establish biofilm then additional 72 hr mock treatment at 37C
rplR	A1S_3065		50S ribosomal protein L18	3.37	Rumbo-Feal 2013	ATCC 17978	24 hr biofilm, continuous flow microfermentor on Pyrex slide at 37C
rplR	A1S_3065	ABUW_0422	ribosomal protein L18	4.71047	Penesyan 2019	AB5075-UW	144 hr biofilm, 72 hr continuous flow at 37C to establish biofilm then additional 72 hr mock treatment at 37C
rplF	A1S_3066		50S ribosomal protein L6	2.55	Rumbo-Feal 2013	ATCC 17978	24 hr biofilm, continuous flow microfermentor on Pyrex slide at 37C
rplF	A1S_3066	ABUW_0421	ribosomal protein L6	4.534	Penesyan 2019	AB5075-UW	144 hr biofilm, 72 hr continuous flow at 37C to establish biofilm then additional 72 hr mock treatment at 37C
rpsH	A1S_3067	ABUW_0420	ribosomal protein S8	4.6142	Penesyan 2019	AB5075-UW	144 hr biofilm, 72 hr continuous flow at 37C to establish biofilm then additional 72 hr mock treatment at 37C
rpsN	A1S_3068		30S ribosomal protein S14	2.9	Rumbo-Feal 2013	ATCC 17978	24 hr biofilm, continuous flow microfermentor on Pyrex slide at 37C
rpsN	A1S_3068	ABUW_0419	ribosomal protein S14	4.44778	Penesyan 2019	AB5075-UW	144 hr biofilm, 72 hr continuous flow at 37C to establish biofilm then additional 72 hr mock treatment at 37C
rplE	A1S_3069		50S ribosomal protein L5	2.13	Rumbo-Feal 2013	ATCC 17978	24 hr biofilm, continuous flow microfermentor on Pyrex slide at 37C
rplE	A1S_3069	ABUW_0418	ribosomal protein L5	4.20923	Penesyan 2019	AB5075-UW	144 hr biofilm, 72 hr continuous flow at 37C to establish biofilm then additional 72 hr mock treatment at 37C
rplX	A1S_3070		50S ribosomal protein L24	2.26	Rumbo-Feal 2013	ATCC 17978	24 hr biofilm, continuous flow microfermentor on Pyrex slide at 37C
rplX	A1S_3070	ABUW_0417	ribosomal protein L24	3.77737	Penesyan 2019	AB5075-UW	144 hr biofilm, 72 hr continuous flow at 37C to establish biofilm then additional 72 hr mock treatment at 37C
rplN	A1S_3071	ABUW_0416	ribosomal protein L14	4.07592	Penesyan 2019	AB5075-UW	144 hr biofilm, 72 hr continuous flow at 37C to establish biofilm then additional 72 hr mock treatment at 37C
rpsQ	A1S_3072	ABUW_0415	ribosomal protein S17	4.72741	Penesyan 2019	AB5075-UW	144 hr biofilm, 72 hr continuous flow at 37C to establish biofilm then additional 72 hr mock treatment at 37C
rpmC	A1S_3073		50S ribosomal protein L29	2.01	Rumbo-Feal 2013	ATCC 17978	24 hr biofilm, continuous flow microfermentor on Pyrex slide at 37C
rpmC	A1S_3073	ABUW_0414	ribosomal protein L29	4.45389	Penesyan 2019	AB5075-UW	144 hr biofilm, 72 hr continuous flow at 37C to establish biofilm then additional 72 hr mock treatment at 37C
rplP	A1S_3074		50S ribosomal protein L16	2.05	Rumbo-Feal 2013	ATCC 17978	24 hr biofilm, continuous flow microfermentor on Pyrex slide at 37C
rplP	A1S_3074	ABUW_0413	ribosomal protein L16	4.91614	Penesyan 2019	AB5075-UW	144 hr biofilm, 72 hr continuous flow at 37C to establish biofilm then additional 72 hr mock treatment at 37C
rpsC	A1S_3075		30S ribosomal protein S3	1.73	Rumbo-Feal 2013	ATCC 17978	24 hr biofilm, continuous flow microfermentor on Pyrex slide at 37C
rpsC	A1S_3075	ABUW_0412	ribosomal protein S3	5.45193	Penesyan 2019	AB5075-UW	144 hr biofilm, 72 hr continuous flow at 37C to establish biofilm then additional 72 hr mock treatment at 37C
rplV	A1S_3076	ABUW_0411	ribosomal protein L22	5.3886	Penesyan 2019	AB5075-UW	144 hr biofilm, 72 hr continuous flow at 37C to establish biofilm then additional 72 hr mock treatment at 37C
rplB	A1S_3077		50S ribosomal protein L2	1.75	Rumbo-Feal 2013	ATCC 17978	24 hr biofilm, continuous flow microfermentor on Pyrex slide at 37C
rplB	A1S_3077	ABUW_0409	ribosomal protein L2	5.6347	Penesyan 2019	AB5075-UW	144 hr biofilm, 72 hr continuous flow at 37C to establish biofilm then additional 72 hr mock treatment at 37C
rplW	A1S_3078	ABUW_0408	ribosomal protein L23	5.79653	Penesyan 2019	AB5075-UW	144 hr biofilm, 72 hr continuous flow at 37C to establish biofilm then additional 72 hr mock treatment at 37C
rplD	A1S_3079		50S ribosomal protein L4	1.87	Rumbo-Feal 2013	ATCC 17978	24 hr biofilm, continuous flow microfermentor on Pyrex slide at 37C
rplD	A1S_3079	ABUW_0407	ribosomal protein L4/L1e	5.76157	Penesyan 2019	AB5075-UW	144 hr biofilm, 72 hr continuous flow at 37C to establish biofilm then additional 72 hr mock treatment at 37C
rplC	A1S_3080		50S ribosomal protein L3	2.13	Rumbo-Feal 2013	ATCC 17978	24 hr biofilm, continuous flow microfermentor on Pyrex slide at 37C
rplC	A1S_3080	ABUW_0406	ribosomal protein L3	5.05872	Penesyan 2019	AB5075-UW	144 hr biofilm, 72 hr continuous flow at 37C to establish biofilm then additional 72 hr mock treatment at 37C
rpsJ	A1S_3081	ABUW_0405	ribosomal protein S10	4.1367	Penesyan 2019	AB5075-UW	144 hr biofilm, 72 hr continuous flow at 37C to establish biofilm then additional 72 hr mock treatment at 37C
corA	A1S_3098	ABUW_0388	magnesium and cobalt transport protein	2.75379	Penesyan 2019	AB5075-UW	144 hr biofilm, 72 hr continuous flow at 37C to establish biofilm then additional 72 hr mock treatment at 37C
mlaB	A1S_3099	ABUW_0387	toluene tolerance protein Ttg2B	2.77284	Penesyan 2019	AB5075-UW	144 hr biofilm, 72 hr continuous flow at 37C to establish biofilm then additional 72 hr mock treatment at 37C
mlaE	A1S_3102	ABUW_0384	toluene tolerance efflux protein	2.30515	Penesyan 2019	AB5075-UW	144 hr biofilm, 72 hr continuous flow at 37C to establish biofilm then additional 72 hr mock treatment at 37C
	A1S_3104		ATP-dependent RNA helicase	1.64	Rumbo-Feal 2013	ATCC 17978	24 hr biofilm, continuous flow microfermentor on Pyrex slide at 37C
	A1S_3104	ABUW_0381	DEAD/DEAH box helicase	5.99943	Penesyan 2019	AB5075-UW	144 hr biofilm, 72 hr continuous flow at 37C to establish biofilm then additional 72 hr mock treatment at 37C
glyQ	A1S_3118	ABUW_0367	glycyl-tRNA synthetase, alpha subunit	3.01174	Penesyan 2019	AB5075-UW	144 hr biofilm, 72 hr continuous flow at 37C to establish biofilm then additional 72 hr mock treatment at 37C
glyS	A1S_3119	ABUW_0366	glycyl-tRNA synthetase, beta subunit	2.43422	Penesyan 2019	AB5075-UW	144 hr biofilm, 72 hr continuous flow at 37C to establish biofilm then additional 72 hr mock treatment at 37C
	A1S_3127	ABUW_0356	hypothetical protein	2.12043	Penesyan 2019	AB5075-UW	144 hr biofilm, 72 hr continuous flow at 37C to establish biofilm then additional 72 hr mock treatment at 37C
	A1S_3134		glutamate dehydrogenase	1.26	Rumbo-Feal 2013	ATCC 17978	24 hr biofilm, continuous flow microfermentor on Pyrex slide at 37C
mdaB	A1S_3148	ABUW_0335	modulator of drug activity B, NADPH specific quinone oxidoreductase	6.12084	Penesyan 2019	AB5075-UW	144 hr biofilm, 72 hr continuous flow at 37C to establish biofilm then additional 72 hr mock treatment at 37C
	A1S_3149	ABUW_0334	hypothetical protein	4.33568	Penesyan 2019	AB5075-UW	144 hr biofilm, 72 hr continuous flow at 37C to establish biofilm then additional 72 hr mock treatment at 37C
	A1S_3161		50S ribosomal protein L19	2.57	Rumbo-Feal 2013	ATCC 17978	24 hr biofilm, continuous flow microfermentor on Pyrex slide at 37C
rplS	A1S_3161	ABUW_0323	ribosomal protein L19	3.95099	Penesyan 2019	AB5075-UW	144 hr biofilm, 72 hr continuous flow at 37C to establish biofilm then additional 72 hr mock treatment at 37C
trmD	A1S_3162	ABUW_0322	tRNA (guanine-N1)-methyltransferase	4.15188	Penesyan 2019	AB5075-UW	144 hr biofilm, 72 hr continuous flow at 37C to establish biofilm then additional 72 hr mock treatment at 37C
rimM	A1S_3163	ABUW_0321	16S rRNA processing protein RimM	4.02459	Penesyan 2019	AB5075-UW	144 hr biofilm, 72 hr continuous flow at 37C to establish biofilm then additional 72 hr mock treatment at 37C
rpsP	A1S_3164	ABUW_0320	ribosomal protein S16	3.55126	Penesyan 2019	AB5075-UW	144 hr biofilm, 72 hr continuous flow at 37C to establish biofilm then additional 72 hr mock treatment at 37C
pilY1	A1S_3167	LH92_RS15875	PilY1	1.44025	Alvarez-Fraga 2016	MAR002	24 hr biofilm, continuous flow microfermentor on Pyrex slide at 37C
	A1S_3177	LH92_RS15945	Fimbrial protein	0.6019	Alvarez-Fraga 2016	MAR002	24 hr biofilm, continuous flow microfermentor on Pyrex slide at 37C
mraY	A1S_3201	ABUW_0286	phospho-N-acetylmuramoyl-pentapeptide- transferase	2.44341	Penesyan 2019	AB5075-UW	144 hr biofilm, 72 hr continuous flow at 37C to establish biofilm then additional 72 hr mock treatment at 37C
murF	A1S_3202	ABUW_0285	UDP-N-acetylmuramoylalanyl-D-glutamyl-2, 6-diaminopimelate--D-alanyl-D-alanyl ligase	2.51765	Penesyan 2019	AB5075-UW	144 hr biofilm, 72 hr continuous flow at 37C to establish biofilm then additional 72 hr mock treatment at 37C
murE	A1S_3203	ABUW_0284	UDP-N-acetylmuramyl-tripeptide synthetase	2.61314	Penesyan 2019	AB5075-UW	144 hr biofilm, 72 hr continuous flow at 37C to establish biofilm then additional 72 hr mock treatment at 37C
	A1S_3221	ABUW_0262	ABC transporter ATP-binding protein	2.04526	Penesyan 2019	AB5075-UW	144 hr biofilm, 72 hr continuous flow at 37C to establish biofilm then additional 72 hr mock treatment at 37C
	A1S_3231	ABUW_0255	succinyl-CoA:coenzyme A transferase	2.28466	Penesyan 2019	AB5075-UW	144 hr biofilm, 72 hr continuous flow at 37C to establish biofilm then additional 72 hr mock treatment at 37C
	A1S_3231		acetyl-CoA hydrolase/transferase	3.42	Rumbo-Feal 2013	ATCC 17978	24 hr biofilm, continuous flow microfermentor on Pyrex slide at 37C
	A1S_3260		hypothetical protein	1.59	Rumbo-Feal 2013	ATCC 17978	24 hr biofilm, continuous flow microfermentor on Pyrex slide at 37C
gabT	A1S_3281	ABUW_0203	4-aminobutyrate transaminase	3.54179	Penesyan 2019	AB5075-UW	144 hr biofilm, 72 hr continuous flow at 37C to establish biofilm then additional 72 hr mock treatment at 37C
	A1S_3297		outer membrane protein	1.17	Rumbo-Feal 2013	ATCC 17978	24 hr biofilm, continuous flow microfermentor on Pyrex slide at 37C
	A1S_3300	ABUW_0184	Na+/solute symporter	2.12454	Penesyan 2019	AB5075-UW	144 hr biofilm, 72 hr continuous flow at 37C to establish biofilm then additional 72 hr mock treatment at 37C
	A1S_3300		acetate permease	17.44	Rumbo-Feal 2013	ATCC 17978	24 hr biofilm, continuous flow microfermentor on Pyrex slide at 37C
	A1S_3301		hypothetical protein	5.77	Rumbo-Feal 2013	ATCC 17978	24 hr biofilm, continuous flow microfermentor on Pyrex slide at 37C
	A1S_3303		hypothetical protein	5.78	Rumbo-Feal 2013	ATCC 17978	24 hr biofilm, continuous flow microfermentor on Pyrex slide at 37C
	A1S_3309		acetyl-CoA synthetase	4.17	Rumbo-Feal 2013	ATCC 17978	24 hr biofilm, continuous flow microfermentor on Pyrex slide at 37C
xenB	A1S_3314	ABUW_0170	N-ethylmaleimide reductase	2.87902	Penesyan 2019	AB5075-UW	144 hr biofilm, 72 hr continuous flow at 37C to establish biofilm then additional 72 hr mock treatment at 37C
	A1S_3315	ABUW_0169	transcriptional regulator, ArsR family	3.24492	Penesyan 2019	AB5075-UW	144 hr biofilm, 72 hr continuous flow at 37C to establish biofilm then additional 72 hr mock treatment at 37C
guaB	A1S_3321	ABUW_0162	inosine-5'-monophosphate dehydrogenase	2.07118	Penesyan 2019	AB5075-UW	144 hr biofilm, 72 hr continuous flow at 37C to establish biofilm then additional 72 hr mock treatment at 37C
ddlB	A1S_3334	ABUW_0148	D-alanine--D-alanine ligase B	2.04517	Penesyan 2019	AB5075-UW	144 hr biofilm, 72 hr continuous flow at 37C to establish biofilm then additional 72 hr mock treatment at 37C
ribB1	A1S_3388	ABUW_0095	3,4-dihydroxy-2-butanone 4-phosphate synthase	2.64396	Penesyan 2019	AB5075-UW	144 hr biofilm, 72 hr continuous flow at 37C to establish biofilm then additional 72 hr mock treatment at 37C
thiL	A1S_3391	ABUW_0092	thiamine-monophosphate kinase	2.25119	Penesyan 2019	AB5075-UW	144 hr biofilm, 72 hr continuous flow at 37C to establish biofilm then additional 72 hr mock treatment at 37C
glmU	A1S_3393	ABUW_0090	UDP-N-acetylglucosamine diphosphorylase/glucosamine-1- phosphate N-acetyltransferase	2.29343	Penesyan 2019	AB5075-UW	144 hr biofilm, 72 hr continuous flow at 37C to establish biofilm then additional 72 hr mock treatment at 37C
hutG	A1S_3402	ABUW_0081	formimidoylglutamase	2.02852	Penesyan 2019	AB5075-UW	144 hr biofilm, 72 hr continuous flow at 37C to establish biofilm then additional 72 hr mock treatment at 37C
hutG	A1S_3402		arginase/agmatinase/formimionoglutamate hydrolase	3.72	Rumbo-Feal 2013	ATCC 17978	24 hr biofilm, continuous flow microfermentor on Pyrex slide at 37C
	A1S_3404		amino acid APC transporter	3.88	Rumbo-Feal 2013	ATCC 17978	24 hr biofilm, continuous flow microfermentor on Pyrex slide at 37C
hutH	A1S_3405	ABUW_0078	histidine ammonia-lyase	2.37042	Penesyan 2019	AB5075-UW	144 hr biofilm, 72 hr continuous flow at 37C to establish biofilm then additional 72 hr mock treatment at 37C
hutH	A1S_3405		histidine ammonia-lyase	3.13	Rumbo-Feal 2013	ATCC 17978	24 hr biofilm, continuous flow microfermentor on Pyrex slide at 37C
hutU	A1S_3406	ABUW_0077	urocanate hydratase	2.55584	Penesyan 2019	AB5075-UW	144 hr biofilm, 72 hr continuous flow at 37C to establish biofilm then additional 72 hr mock treatment at 37C
hutU	A1S_3406		urocanate hydratase	3.92	Rumbo-Feal 2013	ATCC 17978	24 hr biofilm, continuous flow microfermentor on Pyrex slide at 37C
	A1S_3407		urocanase	4.52	Rumbo-Feal 2013	ATCC 17978	24 hr biofilm, continuous flow microfermentor on Pyrex slide at 37C
	A1S_3413		APC family aromatic amino acid transporter	66.3	Rumbo-Feal 2013	ATCC 17978	24 hr biofilm, continuous flow microfermentor on Pyrex slide at 37C
	A1S_3414		fumarylacetoacetase	60.1	Rumbo-Feal 2013	ATCC 17978	24 hr biofilm, continuous flow microfermentor on Pyrex slide at 37C
	A1S_3415		maleylacetoacetate isomerase	24.49	Rumbo-Feal 2013	ATCC 17978	24 hr biofilm, continuous flow microfermentor on Pyrex slide at 37C
	A1S_3416		glyoxalase/bleomycin resistance protein/dioxygenas	24.26	Rumbo-Feal 2013	ATCC 17978	24 hr biofilm, continuous flow microfermentor on Pyrex slide at 37C
	A1S_3418		4-hydroxyphenylpyruvate dioxygenase	78.62	Rumbo-Feal 2013	ATCC 17978	24 hr biofilm, continuous flow microfermentor on Pyrex slide at 37C
nlpB	A1S_3424	ABUW_0060	putative lipoprotein-34 precursor	2.58002	Penesyan 2019	AB5075-UW	144 hr biofilm, 72 hr continuous flow at 37C to establish biofilm then additional 72 hr mock treatment at 37C
purC	A1S_3425	ABUW_0059	phosphoribosylaminoimidazole-succinocarboxamide synthase	2.30733	Penesyan 2019	AB5075-UW	144 hr biofilm, 72 hr continuous flow at 37C to establish biofilm then additional 72 hr mock treatment at 37C
alrA	A1S_3439	ABUW_0042	aldo/keto reductase	4.99227	Penesyan 2019	AB5075-UW	144 hr biofilm, 72 hr continuous flow at 37C to establish biofilm then additional 72 hr mock treatment at 37C
	A1S_3440	ABUW_0041	major facilitator family transporter	4.79671	Penesyan 2019	AB5075-UW	144 hr biofilm, 72 hr continuous flow at 37C to establish biofilm then additional 72 hr mock treatment at 37C
	A1S_3475		hypothetical protein	1.15	Rumbo-Feal 2013	ATCC 17978	24 hr biofilm, continuous flow microfermentor on Pyrex slide at 37C
rpmI	A1S_3504	ABUW_3285	ribosomal protein L35	4.4946	Penesyan 2019	AB5075-UW	144 hr biofilm, 72 hr continuous flow at 37C to establish biofilm then additional 72 hr mock treatment at 37C
	A1S_3506	ABUW_3278	hypothetical protein	2.9071	Penesyan 2019	AB5075-UW	144 hr biofilm, 72 hr continuous flow at 37C to establish biofilm then additional 72 hr mock treatment at 37C
	A1S_3563	ABUW_3184	hypothetical protein	3.07544	Penesyan 2019	AB5075-UW	144 hr biofilm, 72 hr continuous flow at 37C to establish biofilm then additional 72 hr mock treatment at 37C
	A1S_3569	LH92_RS03765	Hypothetical protein, LH92_RS03765	2.53846	Alvarez-Fraga 2016	MAR002	24 hr biofilm, continuous flow microfermentor on Pyrex slide at 37C
	A1S_3736	ABUW_1911	hypothetical protein	2.14922	Penesyan 2019	AB5075-UW	144 hr biofilm, 72 hr continuous flow at 37C to establish biofilm then additional 72 hr mock treatment at 37C
	A1S_3791	ABUW_1563	hypothetical protein	4.04059	Penesyan 2019	AB5075-UW	144 hr biofilm, 72 hr continuous flow at 37C to establish biofilm then additional 72 hr mock treatment at 37C
	A1S_3867	ABUW_3881	matrixin superfamily	3.08164	Penesyan 2019	AB5075-UW	144 hr biofilm, 72 hr continuous flow at 37C to establish biofilm then additional 72 hr mock treatment at 37C
	A1S_3951	ABUW_2860	hypothetical protein	4.0973	Penesyan 2019	AB5075-UW	144 hr biofilm, 72 hr continuous flow at 37C to establish biofilm then additional 72 hr mock treatment at 37C
	No alignment	ABUW_1257	hypothetical protein	2.01085	Penesyan 2019	AB5075-UW	144 hr biofilm, 72 hr continuous flow at 37C to establish biofilm then additional 72 hr mock treatment at 37C
	No alignment	ABUW_0749	hypothetical protein	2.05259	Penesyan 2019	AB5075-UW	144 hr biofilm, 72 hr continuous flow at 37C to establish biofilm then additional 72 hr mock treatment at 37C
	No alignment	ABUW_1260	hypothetical protein	2.06548	Penesyan 2019	AB5075-UW	144 hr biofilm, 72 hr continuous flow at 37C to establish biofilm then additional 72 hr mock treatment at 37C
	No alignment	ABUW_1258	hypothetical protein	2.09603	Penesyan 2019	AB5075-UW	144 hr biofilm, 72 hr continuous flow at 37C to establish biofilm then additional 72 hr mock treatment at 37C
	No alignment	ABUW_3011	hypothetical protein	2.20238	Penesyan 2019	AB5075-UW	144 hr biofilm, 72 hr continuous flow at 37C to establish biofilm then additional 72 hr mock treatment at 37C
cmlA	No alignment	ABUW_4059	Chloramphenicol resistance protein	2.2482	Penesyan 2019	AB5075-UW	144 hr biofilm, 72 hr continuous flow at 37C to establish biofilm then additional 72 hr mock treatment at 37C
	No alignment	ABUW_1479	transcriptional regulator, LysR family	2.25464	Penesyan 2019	AB5075-UW	144 hr biofilm, 72 hr continuous flow at 37C to establish biofilm then additional 72 hr mock treatment at 37C
	No alignment	ABUW_0565	phage tail protein	2.33342	Penesyan 2019	AB5075-UW	144 hr biofilm, 72 hr continuous flow at 37C to establish biofilm then additional 72 hr mock treatment at 37C
	No alignment	ABUW_0567	phage tail sheath protein	2.49738	Penesyan 2019	AB5075-UW	144 hr biofilm, 72 hr continuous flow at 37C to establish biofilm then additional 72 hr mock treatment at 37C
	No alignment	ABUW_0566	phage tail tube protein	2.74066	Penesyan 2019	AB5075-UW	144 hr biofilm, 72 hr continuous flow at 37C to establish biofilm then additional 72 hr mock treatment at 37C
	No alignment	ABUW_4047	hypothetical protein	2.84853	Penesyan 2019	AB5075-UW	144 hr biofilm, 72 hr continuous flow at 37C to establish biofilm then additional 72 hr mock treatment at 37C
strB	No alignment	ABUW_4055	Streptomycin resistance protein B	3.12454	Penesyan 2019	AB5075-UW	144 hr biofilm, 72 hr continuous flow at 37C to establish biofilm then additional 72 hr mock treatment at 37C
aadA1	No alignment	ABUW_4057	aminoglycoside 3''-adenylyltransferase aadA1	3.21846	Penesyan 2019	AB5075-UW	144 hr biofilm, 72 hr continuous flow at 37C to establish biofilm then additional 72 hr mock treatment at 37C
	No alignment	ABUW_4046	hypothetical protein	4.1388	Penesyan 2019	AB5075-UW	144 hr biofilm, 72 hr continuous flow at 37C to establish biofilm then additional 72 hr mock treatment at 37C
strA	No alignment	ABUW_4056	Aminoglycoside phosphotransferase	5.28836	Penesyan 2019	AB5075-UW	144 hr biofilm, 72 hr continuous flow at 37C to establish biofilm then additional 72 hr mock treatment at 37C
	No alignment	ABUW_1478	cyclase family protein	6.35726	Penesyan 2019	AB5075-UW	144 hr biofilm, 72 hr continuous flow at 37C to establish biofilm then additional 72 hr mock treatment at 37C
	Uncalled	ABUW_0650	hypothetical protein	2.10582	Penesyan 2019	AB5075-UW	144 hr biofilm, 72 hr continuous flow at 37C to establish biofilm then additional 72 hr mock treatment at 37C
	Uncalled	ABUW_3477	hypothetical protein	2.29296	Penesyan 2019	AB5075-UW	144 hr biofilm, 72 hr continuous flow at 37C to establish biofilm then additional 72 hr mock treatment at 37C
	Uncalled	ABUW_0220	hypothetical protein	2.70843	Penesyan 2019	AB5075-UW	144 hr biofilm, 72 hr continuous flow at 37C to establish biofilm then additional 72 hr mock treatment at 37C
	Uncalled	ABUW_3684	hypothetical protein	3.85264	Penesyan 2019	AB5075-UW	144 hr biofilm, 72 hr continuous flow at 37C to establish biofilm then additional 72 hr mock treatment at 37C
	Uncalled	ABUW_0382	hypothetical protein	4.13022	Penesyan 2019	AB5075-UW	144 hr biofilm, 72 hr continuous flow at 37C to establish biofilm then additional 72 hr mock treatment at 37C
rpsS	Uncalled	ABUW_0410	ribosomal protein S19	5.71697	Penesyan 2019	AB5075-UW	144 hr biofilm, 72 hr continuous flow at 37C to establish biofilm then additional 72 hr mock treatment at 37C
